# Supplementary material for: Cancer risk among insulin users: comparing analogues with human insulin in the CARING five-country cohort study
Source: Springer Nature journal article supplement (doi:10.1007/s00125-017-4312-5), 2017-06-01
Supplement: MOESM1 [file 12332196]

## Electronic supplementary material

**ESM methods.** Detailed description of the calculation of cumulative treatment time.

**ESM Table 1.** Adjusted rate ratios with 95% confidence interval for site- and sex-specific cancers: pairwise comparisons of glargine, detemir, and human insulin by the cumulative treatment time.

**ESM Table 2.** Results of sensitivity analyses, men.

**ESM Table 3.** Results of sensitivity analyses, women.

**ESM Figure 1.** Adjusted rate ratios for glargine versus human insulin.

**ESM Figure 2.** Adjusted rate ratios for detemir versus human insulin.

**ESM Figure 3.** Adjusted rate ratios for glargine versus detemir.

### **Detailed description of the calculation of cumulative treatment time**

Below we describe a time-dependent approach that we used to construct the cumulative exposure as a cumulative time on treatment. Hereafter, by exposure to specific insulin we mean a cumulative time on this insulin treatment. Prescription data from the Nordic registries included the date and amount purchased in defined daily doses (DDDs) [29], but no information on individual dosage ([http://www.whocc.no/ddd/definition\\_and\\_general\\_considera/](http://www.whocc.no/ddd/definition_and_general_considera/)). For the CPRD cohort, we derived DDDs from the dosage information (substance strength and amount) contained by prescription data. Given a large effect of some individual's characteristics such as age, weight etc., on actual dosing, we assumed that cumulative time on particular insulin is more relevant exposure measure than actual DDDs per se. DDDs were used to calculate cumulative time under exposure, assuming a dose of 1 DDD per day. One DDD equals 40 IU for all insulins of interest (human insulin, insulin glargine and detemir), except human insulin for inhalation (A10AF01).

In exposure calculations we used the R language package **Epi** (Bendix Carstensen, Martyn Plummer, Esa Läärä, Michael Hills (2016). *Epi: A Package for Statistical Analysis in Epidemiology*. R package version 2.0. URL <http://CRAN.R-project.org/package=Epi>). More specifically, we used the **gen.exp** function, which is designed for construction of relevant covariates from purchase records. The information we used to construct the exposure variables included person identification numbers, date of each purchase, amount purchased, assumed daily dose, follow-up purchase (prescription) data. The basic ideas behind this function and illustrative examples are presented in the Tabulation outline (<http://www.bendixcarstensen.com/DCRC/Tabulate/tabulate.pdf>) by Bendix Carstensen.

For each insulin type of interest, the exposure was defined to begin on the date of first purchase (prescription), after which point an individual was considered exposed for the rest of his/her follow-up period. We generated exposure covariates for the insulin treatments of interest (human insulin, insulin glargine, insulin detemir) for the entire follow-up of each individual. We transformed each purchase (prescription) record into a period it covered according to the amount of DDDs, when assuming a constant dose rate of 1 DDD per day. For instance, 400 IUs of insulin glargine equals to ten DDDs and, thus, cover the period of ten days. Therefore, the period covered by this purchase (prescription) is a time from the date of purchase (prescription) to the date of purchase plus 10 days. All purchases (prescriptions) were translated into exposure time in the same way for all persons.

To record any changes in one's medication state during the follow-up period, we split the individual follow-up time into 120-day intervals, and updated the exposure at the beginning of each interval. In

the `gen.exp` function, use of information of dose rate was allowed by setting argument `use.dpt=TRUE`. In episodes of repeated prescriptions, this resulted in stacked exposure periods. By setting `push.max=1` we allowed the start of exposure to particular purchase to be pushed into the future by maximum of 1 day. Time on a particular insulin accumulated until exposure stopped, and cumulative exposure remained unchanged unless individual resumed treatment. In episodes of repeated prescriptions, possible gaps between the periods not covered by adjacent purchases were ignored in the calculation of cumulative treatment time.

Resulting datasets (one for each cohort) consisted of records with the intervals of short length, at the start for which cumulative treatment time was calculated for each of three insulin types of interest. Some of the individuals were treated with only one insulin type through the entire follow-up period, whereas others used different types of insulin. Thus, there were individuals who remained unexposed to all of the insulins of interest or to some of them, while for others the time at each of three insulin treatments of interest accumulated.

For instance, an individual with an entire follow-up length of four years started with human insulin and used it during the first three years of follow-up period so that purchased amount covered only 2.5 years. After two years he or she started detemir and during one year purchased amount corresponding to 1.08 years of exposure. Because the gaps of six months between the purchases of human insulin do not contribute to the cumulative treatment time, and because of quitting this treatment after three years, exposure to human insulin reached maximum of 2.5 years after three years and remained at this level until the end of follow-up. During the first two years of follow-up, individual remained unexposed to detemir and during the third year of follow-up the exposure exceeded one exposure year by one month so that this one month of the exposure was not accounted for at the end of follow-up. The exposure to human insulin remained zero throughout the entire follow-up.

Finally, three exposure variables (human insulin, insulin glargine, insulin detemir) were categorized into broader and finer exposure covariates by dividing cumulative treatment time into half-year categories for the first year, followed by one-year categories for longer exposure; the last categories were  $> 6$  years for the broadly, and  $> 12$  years for the finely categorized long-term exposure. In addition, each exposure variable incorporated a category to denote whether one stayed unexposed to the specific insulin represented by the variable.

## ESM tables

**ESM Table 1.** Adjusted (all sites and any cancer: age, calendar time, NIADs, duration of insulin-treated diabetes, country; liver, colorectal, breast, and endometrial cancer: additional adjustment for relevant co-medications) rate ratios (RR) with 95% confidence interval (CI) for site- and sex-specific cancers: pairwise comparisons of glargine, detemir, and human insulin by the cumulative treatment time (years).

| Cumulative treatment time, years | Glargine versus Human Insulin |         |                      |         | Detemir versus Human Insulin |         |                      |         | Glargine versus Detemir |         |                      |         |
|----------------------------------|-------------------------------|---------|----------------------|---------|------------------------------|---------|----------------------|---------|-------------------------|---------|----------------------|---------|
|                                  | Male                          |         | Female               |         | Male                         |         | Female               |         | Male                    |         | Female               |         |
|                                  | RR (95% CI)                   | P-value | RR (95% CI)          | P-value | RR (95% CI)                  | P-value | RR (95% CI)          | P-value | RR (95% CI)             | P-value | RR (95% CI)          | P-value |
| <b>Liver cancer</b>              |                               |         |                      |         |                              |         |                      |         |                         |         |                      |         |
| 0-0.5                            | 0.89<br>(0.54, 1.47)          | .64     | 1.10<br>(0.49, 2.48) | .83     | 1.01<br>(0.54, 1.88)         | .97     | 0.66<br>(0.19, 2.33) | .52     | 0.88<br>(0.44, 1.76)    | 0.72    | 1.66<br>(0.45, 6.16) | .45     |
| 0.5-1                            | 0.89<br>(0.51, 1.56)          | .69     | 0.47<br>(0.14, 1.52) | .21     | 1.35<br>(0.74, 2.44)         | .33     | 0.42<br>(0.09, 1.96) | .27     | 0.66<br>(0.34, 1.28)    | 0.22    | 1.12<br>(0.20, 6.21) | .90     |
| 1-2                              | 1.11<br>(0.69, 1.77)          | .68     | 0.58<br>(0.19, 1.76) | .34     | 0.75<br>(0.38, 1.47)         | .40     | 0.90<br>(0.27, 3.02) | .87     | 1.48<br>(0.74, 2.98)    | 0.27    | 0.64<br>(0.17, 2.46) | .52     |
| 2-3                              | 1.13<br>(0.66, 1.96)          | .66     | 0.62<br>(0.20, 1.86) | .39     | 0.78<br>(0.33, 1.89)         | .59     | 0.57<br>(0.12, 2.72) | .48     | 1.44<br>(0.58, 3.60)    | 0.43    | 1.07<br>(0.2, 5.62)  | .93     |
| 3-4                              | 0.36<br>(0.14, 0.94)          | .04     | 0.52<br>(0.16, 1.66) | .27     | 1.71<br>(0.77, 3.79)         | .19     | 0.76<br>(0.16, 3.55) | .73     | 0.21<br>(0.07, 0.65)    | 0.01    | 0.68<br>(0.12, 3.79) | .66     |
| 4-5                              | 1.11<br>(0.53, 2.31)          | .78     | 0.74<br>(0.20, 2.78) | .66     | 0.92<br>(0.21, 3.90)         | .91     | NE                   | .98     | 1.21<br>(0.26, 5.57)    | 0.80    | NE                   | .98     |
| 5-6                              | 0.75<br>(0.28, 1.96)          | .55     | NE                   | .98     | NE                           | .97     | NE                   | .99     | NE                      | 0.97    | 0.56<br>(NE)         | .99     |
| >6                               | 0.22<br>(0.05, 0.92)          | .04     | 0.56<br>(0.12, 2.56) | .45     | NE                           | .98     | NE                   | .99     | NE                      | 0.98    | NE                   | .99     |
| <b>Pancreatic cancer</b>         |                               |         |                      |         |                              |         |                      |         |                         |         |                      |         |
| 0-0.5                            | 1.08<br>(0.86, 1.36)          | .52     | 0.85<br>(0.64, 1.13) | .25     | 0.76<br>(0.54, 1.07)         | .11     | 0.67<br>(0.44, 1.02) | .06     | 1.42<br>(0.99, 2.03)    | .05     | 1.26<br>(0.8, 1.98)  | .32     |
| 0.5-1                            | 0.9<br>(0.61, 1.34)           | .60     | 1.02<br>(0.67, 1.54) | .94     | 0.71<br>(0.40, 1.26)         | .25     | 0.84<br>(0.46, 1.51) | .56     | 1.26<br>(0.67, 2.35)    | .47     | 1.22<br>(0.64, 2.33) | .55     |
| 1-2                              | 0.67<br>(0.44, 1.03)          | .07     | 0.99<br>(0.64, 1.51) | .95     | 0.87<br>(0.52, 1.44)         | .58     | 1.51<br>(0.93, 2.47) | .10     | 0.77<br>(0.43, 1.39)    | .39     | 0.65<br>(0.37, 1.14) | .13     |
| 2-3                              | 0.34                          | .002    | 1.32                 | .36     | 0.39                         | .05     | 0.85                 | .76     | 0.86                    | .78     | 1.55                 | .43     |

| Cumulative treatment time, years | Glargine versus Human Insulin |         |              |         | Detemir versus Human Insulin |         |               |         | Glargine versus Detemir |         |              |         |
|----------------------------------|-------------------------------|---------|--------------|---------|------------------------------|---------|---------------|---------|-------------------------|---------|--------------|---------|
|                                  | Male                          |         | Female       |         | Male                         |         | Female        |         | Male                    |         | Female       |         |
|                                  | RR (95% CI)                   | P-value | RR (95% CI)  | P-value | RR (95% CI)                  | P-value | RR (95% CI)   | P-value | RR (95% CI)             | P-value | RR (95% CI)  | P-value |
|                                  | (0.17, 0.66)                  |         | (0.73, 2.41) |         | (0.16, 0.99)                 |         | (0.30, 2.42)  |         | (0.29, 2.52)            |         | (0.52, 4.67) |         |
| 3-4                              | 0.53                          | .09     | 0.76         | .54     | 1.07                         | .89     | NE            | .96     | 0.50                    | .19     | NE           | .96     |
|                                  | (0.26, 1.10)                  |         | (0.31, 1.85) |         | (0.45, 2.52)                 |         |               |         | (0.18, 1.41)            |         |              |         |
| 4-5                              | 1.16                          | .72     | 1.29         | .59     | 0.56                         | .57     | 1.56          | .55     | 2.07                    | .49     | 0.83         | .82     |
|                                  | (0.52, 2.59)                  |         | (0.51, 3.23) |         | (0.08, 4.17)                 |         | (0.36, 6.75)  |         | (0.26, 16.57)           |         | (0.17, 4.12) |         |
| 5-6                              | 1.13                          | .79     | 0.62         | .52     | 1.71                         | .47     | NE            | .98     | 0.66                    | .61     | NE           | .98     |
|                                  | (0.45, 2.85)                  |         | (0.14, 2.68) |         | (0.39, 7.47)                 |         |               |         | (0.13, 3.30)            |         |              |         |
| >6                               | NE                            | .94     | 1.01         | .98     | NE                           | .98     | 2.51          | .37     | 0.63                    | .99     | 0.40         | .43     |
|                                  |                               |         | (0.31, 3.32) |         |                              |         | (0.34, 18.62) |         | (NE)                    |         | (0.04, 3.91) |         |
| <b>Lung cancer</b>               |                               |         |              |         |                              |         |               |         |                         |         |              |         |
| 0-0.5                            | 1.10                          | .54     | 1.27         | .03     | 1.17                         | .41     | 1.30          | .33     | 0.94                    | .77     | 0.98         | .94     |
|                                  | (0.81, 1.49)                  |         | (0.83, 1.96) |         | (0.80, 1.71)                 |         | (0.77, 2.21)  |         | (0.62, 1.43)            |         | (0.54, 1.78) |         |
| 0.5-1                            | 0.92                          | .67     | 1.21         | .53     | 0.79                         | .38     | 0.90          | .79     | 1.16                    | .62     | 1.35         | .49     |
|                                  | (0.62, 1.37)                  |         | (0.67, 2.18) |         | (0.47, 1.33)                 |         | (0.41, 1.96)  |         | (0.65, 2.05)            |         | (0.57, 3.17) |         |
| 1-2                              | 1.20                          | .26     | 0.84         | .49     | 0.78                         | .28     | 0.42          | .03     | 1.54                    | .07     | 2.01         | .11     |
|                                  | (0.87, 1.63)                  |         | (0.52, 1.37) |         | (0.49, 1.22)                 |         | (0.19, 0.93)  |         | (0.96, 2.47)            |         | (0.86, 4.73) |         |
| 2-3                              | 0.70                          | .09     | 0.75         | .36     | 0.64                         | .15     | 1.07          | .85     | 1.10                    | .78     | 0.7          | .41     |
|                                  | (0.47, 1.06)                  |         | (0.40, 1.40) |         | (0.35, 1.17)                 |         | (0.52, 2.24)  |         | (0.56, 2.15)            |         | (0.29, 1.64) |         |
| 3-4                              | 0.88                          | .59     | 1.08         | .83     | 1.11                         | .76     | 2.05          | .08     | 0.80                    | .54     | 0.53         | .18     |
|                                  | (0.56, 1.4)                   |         | (0.52, 2.23) |         | (0.57, 2.15)                 |         | (0.92, 4.57)  |         | (0.38, 1.67)            |         | (0.21, 1.35) |         |
| 4-5                              | 1.30                          | .34     | 2.06         | .05     | NE                           | .95     | NE            | .96     | NE                      | .95     | NE           | .95     |
|                                  | (0.76, 2.21)                  |         | (0.99, 4.28) |         |                              |         |               |         |                         |         |              |         |
| 5-6                              | 1.11                          | .77     | 1.66         | .24     | 1.16                         | .83     | NE            | .97     | 0.95                    | .95     | NE           | .97     |
|                                  | (0.54, 2.28)                  |         | (0.71, 3.87) |         | (0.28, 4.83)                 |         |               |         | (0.21, 4.43)            |         |              |         |
| >6                               | 0.56                          | .10     | 0.46         | .19     | NE                           | .97     | 0.74          | .77     | NE                      | .98     | 0.61         | .67     |
|                                  | (0.28, 1.11)                  |         | (0.14, 1.49) |         |                              |         | (0.10, 5.48)  |         |                         |         | (0.06, 5.93) |         |
| <b>Melanoma of skin</b>          |                               |         |              |         |                              |         |               |         |                         |         |              |         |
| 0-0.5                            | 1.07                          | .80     | 1.62         | .10     | 0.93                         | .85     | 1.73          | .13     | 1.15                    | .73     | 0.94         | .87     |
|                                  | (0.63, 1.81)                  |         | (0.91, 2.89) |         | (0.45, 1.93)                 |         | (0.85, 3.51)  |         | (0.52, 2.53)            |         | (0.44, 2.00) |         |
| 0.5-1                            | 0.66                          | .18     | 1.17         | .65     | 0.67                         | .31     | 0.67          | .43     | 0.99                    | .98     | 1.74         | .29     |
|                                  | (0.36, 1.22)                  |         | (0.60, 2.28) |         | (0.30, 1.46)                 |         | (0.25, 1.80)  |         | (0.42, 2.35)            |         | (0.62, 4.87) |         |
| 1-2                              | 1.16                          | .54     | 1.22         | .51     | 1.24                         | .48     | 1.03          | .93     | 0.94                    | .84     | 1.18         | .69     |
|                                  | (0.72, 1.87)                  |         | (0.68, 2.17) |         | (0.68, 2.25)                 |         | (0.48, 2.24)  |         | (0.51, 1.73)            |         | (0.53, 2.62) |         |
| 2-3                              | 0.82                          | .50     | 1.92         | .04     | 1.01                         | .99     | 0.99          | .99     | 0.81                    | .63     | 1.93         | .24     |
|                                  | (0.46, 1.46)                  |         | (1.02, 3.61) |         | (0.46, 2.19)                 |         | (0.33, 2.94)  |         | (0.35, 1.89)            |         | (0.65, 5.75) |         |

| Cumulative treatment time, years | Glargine versus Human Insulin |                      |                      |                      | Detemir versus Human Insulin |                      |                       |                       | Glargine versus Detemir |                      |                      |                       |     |
|----------------------------------|-------------------------------|----------------------|----------------------|----------------------|------------------------------|----------------------|-----------------------|-----------------------|-------------------------|----------------------|----------------------|-----------------------|-----|
|                                  | Male                          |                      | Female               |                      | Male                         |                      | Female                |                       | Male                    |                      | Female               |                       |     |
|                                  | RR (95% CI)                   | P-value              | RR (95% CI)          | P-value              | RR (95% CI)                  | P-value              | RR (95% CI)           | P-value               | RR (95% CI)             | P-value              | RR (95% CI)          | P-value               |     |
| <b>Bladder cancer</b>            | 3-4                           | 1.15<br>(0.63, 2.12) | .65                  | 0.72<br>(0.29, 1.79) | .48                          | 0.72<br>(0.22, 2.38) | .59                   | 0.37<br>(0.05, 2.8)   | .34                     | 1.60<br>(0.47, 5.52) | .46                  | 1.93<br>(0.23, 16.10) | .55 |
|                                  | 4-5                           | 0.89<br>(0.42, 1.86) | .75                  | 3.55<br>(1.68, 7.47) | .001                         | 2.91<br>(1.20, 7.08) | .02                   | 3.44<br>(0.98, 12.08) | .05                     | 0.30<br>(0.11, 0.86) | .03                  | 1.03<br>(0.29, 3.66)  | .96 |
|                                  | 5-6                           | 1.58<br>(0.52, 4.8)  | .42                  | 1.52<br>(0.51, 4.60) | .45                          | NE                   | .97                   | 1.90<br>(0.25, 14.62) | .55                     | NE                   | .97                  | 0.80<br>(0.09, 7.27)  | .85 |
|                                  | >6                            | 1.25<br>(0.58, 2.69) | .57                  | 1.76<br>(0.66, 4.68) | .26                          | NE                   | .98                   | NE                    | .97                     | NE                   | .98                  | NE                    | .97 |
|                                  | 0-0.5                         | 1.41<br>(0.92, 2.17) | .12                  | 1.44<br>(0.61, 3.37) | .41                          | 1.37<br>(0.76, 2.46) | .30                   | 0.88<br>(0.20, 3.89)  | .87                     | 1.03<br>(0.54, 1.95) | .93                  | 1.63<br>(0.34, 7.82)  | .54 |
| 0.5-1                            | 0.97<br>(0.56, 1.65)          | .90                  | 2.91<br>(0.89, 9.48) | .08                  | 0.9<br>(0.43, 1.86)          | .77                  | 2.01<br>(0.39, 10.48) | .41                   | 1.08<br>(0.49, 2.38)    | .86                  | 1.45<br>(0.29, 7.33) | .66                   |     |
| 1-2                              | 0.75<br>(0.46, 1.24)          | .27                  | 0.84<br>(0.29, 2.45) | .75                  | 1.36<br>(0.79, 2.35)         | .27                  | 1.10<br>(0.30, 4.08)  | .88                   | 0.55<br>(0.29, 1.04)    | .07                  | 0.76<br>(0.18, 3.31) | .72                   |     |
| 2-3                              | 0.93<br>(0.56, 1.52)          | .76                  | 0.64<br>(0.21, 1.99) | .44                  | 0.96<br>(0.47, 1.98)         | .92                  | 0.45<br>(0.06, 3.53)  | .45                   | 0.96<br>(0.44, 2.09)    | .92                  | 1.42<br>(0.16, 12.9) | .76                   |     |
| 3-4                              | 0.92<br>(0.52, 1.64)          | .78                  | 0.75<br>(0.16, 3.56) | .72                  | 1.37<br>(0.61, 3.06)         | .45                  | 1.27<br>(0.16, 10.31) | .82                   | 0.67<br>(0.28, 1.64)    | .38                  | 0.59<br>(0.05, 6.65) | .67                   |     |
| 4-5                              | 1.67<br>(0.86, 3.23)          | .13                  | 1.19<br>(0.25, 5.74) | .82                  | 1.06<br>(0.25, 4.49)         | .93                  | NE                    | .98                   | 1.57<br>(0.35, 6.96)    | .56                  | NE                   | .98                   |     |
| 5-6                              | 0.64<br>(0.19, 2.15)          | .47                  | 1.91<br>(0.40, 9.16) | .42                  | NE                           | .97                  | NE                    | .99                   | NE                      | .97                  | NE                   | .99                   |     |
| >6                               | 0.57<br>(0.18, 1.86)          | .35                  | 0.69<br>(0.09, 5.40) | .73                  | NE                           | .98                  | NE                    | .99                   | NE                      | .98                  | NE                   | .99                   |     |
| <b>Colorectal cancer</b>         | 0-0.5                         | 1.28<br>(0.94, 1.75) | .12                  | 1.54<br>(1.06, 2.25) | 0.03                         | 0.89<br>(0.55, 1.43) | 0.64                  | 0.87<br>(0.47, 1.61)  | .65                     | 1.44<br>(0.86, 2.41) | .17                  | 1.78<br>(0.93, 3.41)  | .08 |
|                                  | 0.5-1                         | 0.84<br>(0.56, 1.26) | .40                  | 0.80<br>(0.46, 1.40) | 0.44                         | 0.76<br>(0.45, 1.29) | 0.32                  | 1.81<br>(1.07, 3.08)  | .03                     | 1.10<br>(0.61, 1.99) | .74                  | 0.44<br>(0.23, 0.85)  | .01 |
|                                  | 1-2                           | 0.78<br>(0.56, 1.08) | .14                  | 1.05<br>(0.69, 1.60) | 0.84                         | 0.73<br>(0.47, 1.13) | 0.16                  | 0.64<br>(0.32, 1.26)  | .20                     | 1.07<br>(0.66, 1.74) | .79                  | 1.64<br>(0.8, 3.35)   | .18 |
|                                  | 2-3                           | 1.06<br>(0.75, 1.50) | .72                  | 1.18<br>(0.74, 1.90) | 0.49                         | 0.93<br>(0.56, 1.54) | 0.77                  | 0.81<br>(0.36, 1.80)  | .60                     | 1.15<br>(0.67, 1.98) | .62                  | 1.46<br>(0.63, 3.39)  | .38 |

| Cumulative treatment time, years | Glargine versus Human Insulin |         |                      |         | Detemir versus Human Insulin |         |                       |         | Glargine versus Detemir |         |                      |         |
|----------------------------------|-------------------------------|---------|----------------------|---------|------------------------------|---------|-----------------------|---------|-------------------------|---------|----------------------|---------|
|                                  | Male                          |         | Female               |         | Male                         |         | Female                |         | Male                    |         | Female               |         |
|                                  | RR (95% CI)                   | P-value | RR (95% CI)          | P-value | RR (95% CI)                  | P-value | RR (95% CI)           | P-value | RR (95% CI)             | P-value | RR (95% CI)          | P-value |
| 3-4                              | 0.89<br>(0.56, 1.41)          | .62     | 0.63<br>(0.31, 1.29) | 0.21    | 1.01<br>(0.51, 2.03)         | 0.97    | 1.75<br>(0.82, 3.76)  | .15     | 0.88<br>(0.41, 1.89)    | .74     | 0.36<br>(0.14, 0.94) | .04     |
| 4-5                              | 1.03<br>(0.59, 1.80)          | .92     | 1.15<br>(0.57, 2.31) | 0.70    | 1.12<br>(0.45, 2.82)         | 0.80    | 1.82<br>(0.64, 5.14)  | .26     | 0.92<br>(0.33, 2.51)    | .86     | 0.63<br>(0.20, 2.03) | .44     |
| 5-6                              | 0.69<br>(0.29, 1.62)          | .39     | 0.78<br>(0.28, 2.20) | 0.64    | 0.96<br>(0.23, 3.99)         | 0.96    | 2.64<br>(0.80, 8.71)  | .11     | 0.72<br>(0.14, 3.56)    | .68     | 0.30<br>(0.07, 1.33) | .11     |
| >6                               | 0.50<br>(0.23, 1.08)          | .08     | 0.59<br>(0.21, 1.62) | 0.30    | NE                           | 0.96    | NE                    | .95     | NE                      | .96     | NE                   | .95     |
| <b>Non-Hodgkin's lymphoma</b>    |                               |         |                      |         |                              |         |                       |         |                         |         |                      |         |
| 0-0.5                            | 0.70<br>(0.36, 1.35)          | .29     | 0.68<br>(0.33, 1.42) | .307    | 0.49<br>(0.17, 1.40)         | 0.183   | 0.86<br>(0.35, 2.10)  | .73     | 1.42<br>(0.46, 4.45)    | .54     | 0.80<br>(0.29, 2.24) | .67     |
| 0.5-1                            | 0.93<br>(0.44, 1.94)          | .84     | 1.28<br>(0.55, 2.98) | .570    | 1.14<br>(0.48, 2.73)         | 0.766   | 1.15<br>(0.40, 3.31)  | .80     | 0.81<br>(0.31, 2.12)    | .67     | 1.11<br>(0.37, 3.33) | .85     |
| 1-2                              | 0.96<br>(0.46, 2.01)          | .91     | 1.00<br>(0.47, 2.15) | .99     | 2.00<br>(0.94, 4.25)         | .07     | 1.34<br>(0.54, 3.28)  | .53     | 0.48<br>(0.21, 1.12)    | .09     | 0.75<br>(0.28, 1.98) | .56     |
| 2-3                              | 0.59<br>(0.23, 1.47)          | .25     | 1.28<br>(0.59, 2.77) | .54     | 2.02<br>(0.87, 4.69)         | .10     | 1.17<br>(0.38, 3.56)  | .79     | 0.29<br>(0.10, 0.84)    | .02     | 1.09<br>(0.34, 3.47) | .88     |
| 3-4                              | 1.16<br>(0.55, 2.44)          | .69     | 0.80<br>(0.26, 2.49) | .70     | NE                           | .97     | 1.25<br>(0.28, 5.65)  | .77     | NE                      | .97     | 0.64<br>(0.12, 3.53) | .61     |
| 4-5                              | 1.33<br>(0.55, 3.22)          | .53     | 1.04<br>(0.33, 3.24) | .94     | NE                           | .98     | NE                    | .97     | NE                      | .98     | NE                   | .97     |
| 5-6                              | 0.85<br>(0.19, 3.80)          | .84     | 1.43<br>(0.29, 7.08) | .66     | NE                           | .99     | 3.07<br>(0.36, 25.99) | .30     | NE                      | .99     | 0.47<br>(0.04, 5.20) | .54     |
| >6                               | 1.43<br>(0.54, 3.84)          | .47     | 0.28<br>(0.04, 2.16) | .22     | NE                           | .99     | NE                    | .99     | NE                      | .99     | NE                   | .99     |
| <b>Prostate cancer</b>           |                               |         |                      |         |                              |         |                       |         |                         |         |                      |         |
| 0-0.5                            | 1.08<br>(0.87, 1.35)          | .48     |                      |         | 0.96<br>(0.71, 1.31)         | .81     |                       |         | 1.12<br>(0.80, 1.58)    | .50     |                      |         |
| 0.5-1                            | 0.93<br>(0.71, 1.21)          | .59     |                      |         | 0.84<br>(0.59, 1.20)         | .34     |                       |         | 1.10<br>(0.75, 1.63)    | .62     |                      |         |
| 1-2                              | 1.00<br>(0.79, 1.27)          | .99     |                      |         | 0.96<br>(0.70, 1.32)         | .81     |                       |         | 1.04<br>(0.75, 1.45)    | .82     |                      |         |
| 2-3                              | 0.90<br>(0.69, 1.18)          | .49     |                      |         | 0.87<br>(0.59, 1.29)         | .50     |                       |         | 1.03<br>(0.68, 1.58)    | .88     |                      |         |

| Cumulative<br>treatment<br>time, years | Glargine versus Human Insulin |             |                      |             | Detemir versus Human Insulin |             |                      |             | Glargine versus Detemir |             |                       |             |
|----------------------------------------|-------------------------------|-------------|----------------------|-------------|------------------------------|-------------|----------------------|-------------|-------------------------|-------------|-----------------------|-------------|
|                                        | Male                          |             | Female               |             | Male                         |             | Female               |             | Male                    |             | Female                |             |
|                                        | RR<br>(95% CI)                | P-<br>value | RR<br>(95% CI)       | P-<br>value | RR<br>(95% CI)               | P-<br>value | RR<br>(95% CI)       | P-<br>value | RR<br>(95% CI)          | P-<br>value | RR<br>(95% CI)        | P-<br>value |
| 3-4                                    | 0.98<br>(0.71, 1.34)          | .88         |                      |             | 1.3<br>(0.82, 2.04)          | .26         |                      |             | 0.75<br>(0.46, 1.24)    | .26         |                       |             |
| 4-5                                    | 0.86<br>(0.57, 1.29)          | .45         |                      |             | 0.55<br>(0.20, 1.48)         | .23         |                      |             | 1.57<br>(0.55, 4.47)    | .40         |                       |             |
| 5-6                                    | 0.91<br>(0.55, 1.50)          | .70         |                      |             | 1.30<br>(0.48, 3.54)         | .61         |                      |             | 0.70<br>(0.24, 2.07)    | .52         |                       |             |
| >6                                     | 0.81<br>(0.51, 1.31)          | .40         |                      |             | 0.86<br>(0.21, 3.50)         | .84         |                      |             | 0.94<br>(0.22, 4.06)    | .94         |                       |             |
| <b>Breast<br/>cancer</b>               |                               |             |                      |             |                              |             |                      |             |                         |             |                       |             |
| 0-0.5                                  |                               |             | 1.32<br>(0.98, 1.79) | .07         |                              |             | 0.93<br>(0.59, 1.45) | .74         |                         |             | 1.43<br>(0.88, 2.32)  | .15         |
| 0.5-1                                  |                               |             | 1.32<br>(0.95, 1.85) | .10         |                              |             | 1.04<br>(0.66, 1.61) | .88         |                         |             | 1.28<br>(0.80, 2.05)  | .31         |
| 1-2                                    |                               |             | 1.18<br>(0.88, 1.58) | .27         |                              |             | 1.24<br>(0.86, 1.78) | .26         |                         |             | 0.95<br>(0.64, 1.41)  | .81         |
| 2-3                                    |                               |             | 1.08<br>(0.78, 1.50) | .65         |                              |             | 0.93<br>(0.58, 1.51) | .78         |                         |             | 1.16<br>(0.69, 1.95)  | .58         |
| 3-4                                    |                               |             | 0.86<br>(0.57, 1.30) | .48         |                              |             | 0.90<br>(0.48, 1.70) | .75         |                         |             | 0.95<br>(0.47, 1.91)  | .89         |
| 4-5                                    |                               |             | 1.05<br>(0.65, 1.68) | .86         |                              |             | 1.69<br>(0.89, 3.19) | .11         |                         |             | 0.62<br>(0.30, 1.28)  | .20         |
| 5-6                                    |                               |             | 0.96<br>(0.52, 1.78) | .90         |                              |             | 1.46<br>(0.59, 3.66) | .42         |                         |             | 0.66<br>(0.23, 1.87)  | .43         |
| >6                                     |                               |             | 1.10<br>(0.66, 1.84) | .71         |                              |             | 0.37<br>(0.05, 2.69) | .33         |                         |             | 2.95<br>(0.39, 22.21) | .29         |
| <b>Endometrial<br/>cancer</b>          |                               |             |                      |             |                              |             |                      |             |                         |             |                       |             |
| 0-0.5                                  |                               |             | 1.78<br>(1.07, 2.94) | .03         |                              |             | 1.18<br>(0.57, 2.45) | .66         |                         |             | 1.51<br>(0.69, 3.27)  | .30         |
| 0.5-1                                  |                               |             | 0.86<br>(0.49, 1.50) | .60         |                              |             | 0.44<br>(0.18, 1.04) | .06         |                         |             | 1.97<br>(0.78, 4.99)  | .15         |
| 1-2                                    |                               |             | 0.61<br>(0.35, 1.05) | .07         |                              |             | 0.41<br>(0.18, 0.91) | .03         |                         |             | 1.50<br>(0.62, 3.60)  | .37         |
| 2-3                                    |                               |             | 0.89<br>(0.49, 1.60) | .70         |                              |             | 1.13<br>(0.54, 2.36) | .75         |                         |             | 0.79<br>(0.35, 1.80)  | .58         |
| 3-4                                    |                               |             | 1.63                 | .11         |                              |             | 1.35                 | .54         |                         |             | 1.21                  | .71         |



| Cumulative treatment time, years | Glargine versus Human Insulin |         |                      |         | Detemir versus Human Insulin |         |                       |         | Glargine versus Detemir |         |                      |         |
|----------------------------------|-------------------------------|---------|----------------------|---------|------------------------------|---------|-----------------------|---------|-------------------------|---------|----------------------|---------|
|                                  | Male                          |         | Female               |         | Male                         |         | Female                |         | Male                    |         | Female               |         |
|                                  | RR (95% CI)                   | P-value | RR (95% CI)          | P-value | RR (95% CI)                  | P-value | RR (95% CI)           | P-value | RR (95% CI)             | P-value | RR (95% CI)          | P-value |
| 4-5                              |                               |         | (0.89, 2.96)<br>0.98 | .96     |                              |         | (0.52, 3.51)<br>0.88  | .86     |                         |         | (0.44, 3.30)<br>1.12 | .89     |
| 5-6                              |                               |         | (0.45, 2.15)<br>0.70 | .51     |                              |         | (0.21, 3.71)<br>NE    | .95     |                         |         | (0.24, 5.28)<br>NE   | .95     |
| >6                               |                               |         | (0.24, 2.00)<br>0.34 | .14     |                              |         | 2.68<br>(0.63, 11.42) | .18     |                         |         | 0.13<br>(0.02, 0.92) | .04     |
| <b>Any cancer <sup>a</sup></b>   |                               |         |                      |         |                              |         |                       |         |                         |         |                      |         |
| 0-0.5                            | 1.09<br>(0.99, 1.20)          | .08     | 1.17<br>(1.03, 1.32) | .01     | 0.88<br>(0.76, 1.01)         | .08     | 1.05<br>(0.89, 1.24)  | .54     | 1.24<br>(1.06, 1.45)    | .01     | 1.11<br>(0.92, 1.33) | .27     |
| 0.5-1                            | 0.87<br>(0.77, 1.00)          | .04     | 1.12<br>(0.96, 1.30) | .15     | 0.83<br>(0.70, 0.98)         | .03     | 0.97<br>(0.79, 1.18)  | .73     | 1.06<br>(0.88, 1.27)    | .55     | 1.16<br>(0.93, 1.44) | .18     |
| 1-2                              | 0.90<br>(0.80, 1.01)          | .06     | 0.90<br>(0.79, 1.04) | .16     | 0.89<br>(0.77, 1.03)         | .13     | 0.95<br>(0.8, 1.14)   | .60     | 1.01<br>(0.86, 1.18)    | .93     | 0.95<br>(0.78, 1.15) | .59     |
| 2-3                              | 0.84<br>(0.73, 0.95)          | .007    | 1.04 (0.89,<br>1.22) | .65     | 0.79<br>(0.65, 0.96)         | .02     | 0.96<br>(0.76, 1.21)  | .71     | 1.06<br>(0.86, 1.30)    | .59     | 1.08<br>(0.85, 1.39) | .52     |
| 3-4                              | 0.91<br>(0.78, 1.06)          | .23     | 0.88<br>(0.72, 1.07) | .20     | 1.07<br>(0.85, 1.35)         | .56     | 1.06<br>(0.79, 1.4)   | .71     | 0.85<br>(0.66, 1.09)    | .20     | 0.83<br>(0.61, 1.14) | .26     |
| 4-5                              | 0.93<br>(0.77, 1.12)          | .46     | 1.10<br>(0.88, 1.37) | .40     | 0.88<br>(0.62, 1.25)         | .48     | 0.94<br>(0.62, 1.41)  | .76     | 1.06<br>(0.72, 1.55)    | .77     | 1.17<br>(0.76, 1.82) | .48     |
| 5-6                              | 0.96<br>(0.75, 1.22)          | .72     | 0.95<br>(0.71, 1.27) | .75     | 0.95<br>(0.57, 1.57)         | .84     | 1.29<br>(0.81, 2.06)  | .29     | 1.01<br>(0.59, 1.73)    | .98     | 0.74<br>(0.44, 1.25) | .26     |
| >6                               | 0.61<br>(0.48, 0.78)          | <0.001  | 0.76<br>(0.58, 1.01) | .06     | 0.18<br>(0.06, 0.55)         | .003    | 0.84<br>(0.45, 1.58)  | .59     | 3.46<br>(1.09, 10.98)   | .04     | 0.91<br>(0.46, 1.78) | .78     |

<sup>a</sup> Any cancer except non-melanoma skin cancer

Abbreviations: RR – rate ratio, CI – confidence interval, NE – not estimable.

**ESM Table 2.** Results of the sensitivity analyses for men: adjusted (all sites and any cancer: age, calendar time, NIADs, duration of insulin-treated diabetes, country; liver, colorectal, breast, and endometrial cancer: additional adjustment for relevant co-medications) rate ratios (RR) with 95% confidence interval (CI) for site-specific cancers and any cancer. Pairwise comparisons of glargine, detemir, and human insulin by the cumulative treatment time (years), when restricting the study population (type 2 diabetes, or Nordic countries, or study entry in 2000 or later).

| Cumulative treatment time, years | Type 2 diabetes |            |       | Nordic population |            |       | Entry from 2000 onward |            |       |
|----------------------------------|-----------------|------------|-------|-------------------|------------|-------|------------------------|------------|-------|
|                                  | RR              | 95% CI     | P     | RR                | 95% CI     | P     | RR                     | 95% CI     | P     |
| <b>Liver cancer</b>              |                 |            |       |                   |            |       |                        |            |       |
| <b>Glargine vs Human insulin</b> |                 |            |       |                   |            |       |                        |            |       |
| 0-0.5                            | 0.89            | 0.54, 1.48 | 0.661 | 0.91              | 0.54, 1.54 | 0.718 | 0.87                   | 0.51, 1.49 | 0.603 |
| 0.5-1                            | 0.90            | 0.52, 1.56 | 0.705 | 0.86              | 0.48, 1.55 | 0.620 | 0.65                   | 0.33, 1.29 | 0.222 |
| 1-2                              | 1.09            | 0.68, 1.75 | 0.708 | 0.89              | 0.53, 1.51 | 0.673 | 0.78                   | 0.44, 1.38 | 0.392 |
| 2-3                              | 1.14            | 0.66, 1.97 | 0.643 | 1.01              | 0.55, 1.84 | 0.985 | 1.35                   | 0.71, 2.56 | 0.364 |
| 3-4                              | 0.37            | 0.14, 0.96 | 0.040 | 0.40              | 0.15, 1.05 | 0.061 | 0.37                   | 0.13, 1.06 | 0.064 |
| 4-5                              | 1.25            | 0.61, 2.53 | 0.543 | 1.27              | 0.58, 2.76 | 0.548 | 0.91                   | 0.36, 2.27 | 0.839 |
| 5-6                              | 0.76            | 0.29, 1.99 | 0.574 | 0.94              | 0.35, 2.48 | 0.895 | 1.10                   | 0.37, 3.26 | 0.865 |
| >6                               | 0.23            | 0.05, 0.95 | 0.042 | 0.16              | 0.02, 1.19 | 0.074 | 0.24                   | 0.03, 1.74 | 0.157 |
| <b>Glargine vs Detemir</b>       |                 |            |       |                   |            |       |                        |            |       |
| 0-0.5                            | 0.88            | 0.44, 1.76 | 0.715 | 1.34              | 0.58, 3.07 | 0.489 | 1.25                   | 0.54, 2.88 | 0.603 |
| 0.5-1                            | 0.66            | 0.34, 1.28 | 0.221 | 0.76              | 0.37, 1.55 | 0.447 | 0.53                   | 0.24, 1.17 | 0.116 |
| 1-2                              | 1.48            | 0.74, 2.99 | 0.268 | 1.20              | 0.58, 2.49 | 0.621 | 0.86                   | 0.40, 1.85 | 0.699 |
| 2-3                              | 1.44            | 0.58, 3.59 | 0.434 | 1.45              | 0.53, 3.95 | 0.471 | 1.64                   | 0.54, 4.93 | 0.381 |
| 3-4                              | 0.21            | 0.07, 0.65 | 0.007 | 0.24              | 0.07, 0.75 | 0.014 | 0.42                   | 0.09, 1.88 | 0.257 |
| 4-5                              | 1.33            | 0.29, 6.04 | 0.710 | 0.95              | 0.20, 4.40 | 0.944 | 0.59                   | 0.12, 2.95 | 0.523 |
| 5-6                              | NE              | NE         | 0.971 | NE                | NE         | 0.967 | NE                     | NE         | 0.971 |
| >6                               | NE              | NE         | 0.980 | NE                | NE         | 0.988 | NE                     | NE         | 0.990 |
| <b>Detemir vs Human Insulin</b>  |                 |            |       |                   |            |       |                        |            |       |
| 0-0.5                            | 1.02            | 0.55, 1.89 | 0.956 | 0.68              | 0.32, 1.45 | 0.316 | 0.69                   | 0.32, 1.49 | 0.349 |
| 0.5-1                            | 1.36            | 0.75, 2.46 | 0.317 | 1.14              | 0.59, 2.17 | 0.700 | 1.24                   | 0.63, 2.43 | 0.531 |
| 1-2                              | 0.74            | 0.37, 1.45 | 0.377 | 0.74              | 0.37, 1.49 | 0.401 | 0.90                   | 0.45, 1.82 | 0.776 |
| 2-3                              | 0.79            | 0.33, 1.90 | 0.600 | 0.70              | 0.27, 1.82 | 0.459 | 0.82                   | 0.28, 2.41 | 0.722 |
| 3-4                              | 1.75            | 0.79, 3.89 | 0.168 | 1.69              | 0.72, 3.98 | 0.227 | 0.87                   | 0.26, 2.95 | 0.825 |
| 4-5                              | 0.94            | 0.22, 3.98 | 0.928 | 1.34              | 0.31, 5.77 | 0.693 | 1.54                   | 0.35, 6.65 | 0.567 |
| 5-6                              | 0.00            | NE         | 0.970 | 0.00              | NE         | 0.967 | 0.00                   | NE         | 0.971 |
| >6                               | 0.00            | NE         | 0.978 | 0.00              | NE         | 0.986 | 0.00                   | NE         | 0.989 |
| <b>Pancreatic cancer</b>         |                 |            |       |                   |            |       |                        |            |       |
| <b>Glargine vs Human insulin</b> |                 |            |       |                   |            |       |                        |            |       |
| 0-0.5                            | 1.08            | 0.86, 1.35 | 0.534 | 1.01              | 0.79, 1.30 | 0.929 | 1.05                   | 0.81, 1.35 | 0.712 |
| 0.5-1                            | 0.91            | 0.61, 1.35 | 0.631 | 0.83              | 0.54, 1.27 | 0.392 | 0.82                   | 0.53, 1.27 | 0.373 |
| 1-2                              | 0.67            | 0.44, 1.04 | 0.072 | 0.56              | 0.35, 0.91 | 0.019 | 0.54                   | 0.32, 0.91 | 0.020 |
| 2-3                              | 0.34            | 0.17, 0.67 | 0.002 | 0.32              | 0.16, 0.66 | 0.002 | 0.28                   | 0.13, 0.63 | 0.002 |
| 3-4                              | 0.54            | 0.26, 1.11 | 0.094 | 0.54              | 0.25, 1.17 | 0.118 | 0.61                   | 0.27, 1.40 | 0.246 |
| 4-5                              | 1.19            | 0.53, 2.65 | 0.675 | 0.68              | 0.23, 1.98 | 0.477 | 0.72                   | 0.25, 2.13 | 0.557 |

| Cumulative treatment time, years | Type 2 diabetes |             |       | Nordic population |            |       | Entry from 2000 onward |            |       |
|----------------------------------|-----------------|-------------|-------|-------------------|------------|-------|------------------------|------------|-------|
|                                  | RR              | 95% CI      | P     | RR                | 95% CI     | P     | RR                     | 95% CI     | P     |
| 5-6                              | 1.21            | 0.48, 3.06  | 0.681 | 1.33              | 0.48, 3.64 | 0.580 | 1.57                   | 0.57, 4.35 | 0.381 |
| >6                               | 0.00            | NE          | 0.967 | 0.00              | NE         | 0.974 | 0.00                   | NE         | 0.977 |
| <b>Glargine vs Detemir</b>       |                 |             |       |                   |            |       |                        |            |       |
| 0-0.5                            | 1.41            | 0.99, 2.02  | 0.060 | 1.39              | 0.94, 2.05 | 0.096 | 1.43                   | 0.96, 2.12 | 0.075 |
| 0.5-1                            | 1.26            | 0.68, 2.35  | 0.468 | 1.17              | 0.61, 2.26 | 0.639 | 1.34                   | 0.66, 2.70 | 0.419 |
| 1-2                              | 0.77            | 0.43, 1.39  | 0.393 | 0.72              | 0.37, 1.38 | 0.316 | 0.66                   | 0.33, 1.30 | 0.226 |
| 2-3                              | 0.85            | 0.29, 2.50  | 0.771 | 0.78              | 0.26, 2.33 | 0.653 | 0.75                   | 0.22, 2.57 | 0.648 |
| 3-4                              | 0.50            | 0.18, 1.40  | 0.184 | 0.43              | 0.15, 1.24 | 0.117 | 0.44                   | 0.14, 1.40 | 0.164 |
| 4-5                              | 2.02            | 0.25, 16.20 | 0.507 | NE                | NE         | 0.978 | NE                     | NE         | 0.980 |
| 5-6                              | 1.28            | 0.15, 10.66 | 0.821 | NE                | NE         | 0.986 | NE                     | NE         | 0.987 |
| >6                               | 0.62            | NE          | 1.000 | 0.27              | NE         | 0.999 | 0.28                   | NE         | 1.000 |
| <b>Detemir vs Human Insulin</b>  |                 |             |       |                   |            |       |                        |            |       |
| 0-0.5                            | 0.76            | 0.54, 1.07  | 0.119 | 0.73              | 0.50, 1.05 | 0.089 | 0.73                   | 0.51, 1.07 | 0.104 |
| 0.5-1                            | 0.72            | 0.41, 1.27  | 0.259 | 0.71              | 0.39, 1.28 | 0.255 | 0.61                   | 0.32, 1.16 | 0.134 |
| 1-2                              | 0.87            | 0.52, 1.45  | 0.596 | 0.78              | 0.45, 1.36 | 0.388 | 0.83                   | 0.47, 1.47 | 0.517 |
| 2-3                              | 0.40            | 0.16, 1.00  | 0.050 | 0.42              | 0.17, 1.05 | 0.064 | 0.37                   | 0.13, 1.05 | 0.062 |
| 3-4                              | 1.09            | 0.46, 2.58  | 0.845 | 1.27              | 0.53, 3.04 | 0.591 | 1.39                   | 0.53, 3.62 | 0.503 |
| 4-5                              | 0.59            | 0.08, 4.37  | 0.603 | 0.00              | NE         | 0.978 | 0.00                   | NE         | 0.979 |
| 5-6                              | 0.95            | 0.13, 7.19  | 0.961 | 0.00              | NE         | 0.986 | 0.00                   | NE         | 0.988 |
| >6                               | 0.00            | NE          | 0.986 | 0.00              | NE         | 0.994 | 0.00                   | NE         | 0.996 |
| <b>Lung cancer</b>               |                 |             |       |                   |            |       |                        |            |       |
| <b>Glargine vs Human insulin</b> |                 |             |       |                   |            |       |                        |            |       |
| 0-0.5                            | 1.09            | 0.80, 1.47  | 0.593 | 1.06              | 0.76, 1.47 | 0.753 | 0.97                   | 0.68, 1.38 | 0.865 |
| 0.5-1                            | 0.92            | 0.62, 1.37  | 0.683 | 0.94              | 0.61, 1.46 | 0.779 | 0.98                   | 0.61, 1.57 | 0.922 |
| 1-2                              | 1.18            | 0.86, 1.62  | 0.295 | 1.09              | 0.76, 1.56 | 0.628 | 1.05                   | 0.71, 1.55 | 0.797 |
| 2-3                              | 0.71            | 0.47, 1.07  | 0.102 | 0.77              | 0.49, 1.20 | 0.242 | 0.73                   | 0.45, 1.18 | 0.198 |
| 3-4                              | 0.89            | 0.56, 1.42  | 0.631 | 0.94              | 0.57, 1.56 | 0.823 | 0.81                   | 0.46, 1.41 | 0.456 |
| 4-5                              | 1.38            | 0.82, 2.32  | 0.226 | 1.00              | 0.51, 1.98 | 0.991 | 0.89                   | 0.42, 1.91 | 0.771 |
| 5-6                              | 1.00            | 0.47, 2.12  | 0.992 | 0.89              | 0.35, 2.27 | 0.813 | 1.34                   | 0.51, 3.48 | 0.550 |
| >6                               | 0.57            | 0.29, 1.13  | 0.108 | 0.62              | 0.25, 1.54 | 0.303 | 0.77                   | 0.31, 1.93 | 0.584 |
| <b>Glargine vs Detemir</b>       |                 |             |       |                   |            |       |                        |            |       |
| 0-0.5                            | 0.92            | 0.60, 1.41  | 0.708 | 0.81              | 0.52, 1.27 | 0.352 | 0.76                   | 0.48, 1.22 | 0.256 |
| 0.5-1                            | 1.16            | 0.65, 2.05  | 0.620 | 1.16              | 0.62, 2.19 | 0.636 | 0.99                   | 0.52, 1.88 | 0.964 |
| 1-2                              | 1.52            | 0.94, 2.43  | 0.085 | 1.24              | 0.74, 2.07 | 0.407 | 1.12                   | 0.65, 1.93 | 0.677 |
| 2-3                              | 1.10            | 0.56, 2.14  | 0.788 | 1.01              | 0.50, 2.06 | 0.968 | 1.07                   | 0.49, 2.31 | 0.873 |
| 3-4                              | 0.99            | 0.44, 2.20  | 0.976 | 1.04              | 0.42, 2.60 | 0.931 | 1.60                   | 0.47, 5.50 | 0.456 |
| 4-5                              | NE              | NE          | 0.933 | NE                | NE         | 0.947 | 0.00                   | NE         | 0.952 |
| 5-6                              | 0.84            | 0.18, 3.96  | 0.824 | NE                | NE         | 0.967 | 0.00                   | NE         | 0.971 |
| >6                               | NE              | NE          | 0.966 | NE                | NE         | 0.987 | 0.00                   | NE         | 0.989 |
| <b>Detemir vs Human Insulin</b>  |                 |             |       |                   |            |       |                        |            |       |
| 0-0.5                            | 1.18            | 0.81, 1.72  | 0.396 | 1.31              | 0.88, 1.93 | 0.184 | 1.27                   | 0.85, 1.91 | 0.247 |
| 0.5-1                            | 0.80            | 0.47, 1.34  | 0.390 | 0.81              | 0.46, 1.42 | 0.458 | 0.99                   | 0.56, 1.77 | 0.976 |

| Cumulative treatment time, years | Type 2 diabetes |            |       | Nordic population |            |       | Entry from 2000 onward |             |       |
|----------------------------------|-----------------|------------|-------|-------------------|------------|-------|------------------------|-------------|-------|
|                                  | RR              | 95% CI     | P     | RR                | 95% CI     | P     | RR                     | 95% CI      | P     |
| 1-2                              | 0.78            | 0.50, 1.23 | 0.284 | 0.88              | 0.54, 1.42 | 0.601 | 0.94                   | 0.57, 1.55  | 0.802 |
| 2-3                              | 0.65            | 0.35, 1.19 | 0.162 | 0.75              | 0.40, 1.43 | 0.388 | 0.69                   | 0.34, 1.39  | 0.294 |
| 3-4                              | 0.90            | 0.43, 1.89 | 0.789 | 0.91              | 0.39, 2.10 | 0.820 | 0.51                   | 0.16, 1.62  | 0.252 |
| 4-5                              | 0.00            | NE         | 0.934 | 0.00              | NE         | 0.947 | 0.00                   | NE          | 0.951 |
| 5-6                              | 1.19            | 0.29, 4.93 | 0.813 | 0.00              | NE         | 0.967 | 0.00                   | NE          | 0.971 |
| >6                               | 0.00            | NE         | 0.965 | 0.00              | NE         | 0.986 | 0.00                   | NE          | 0.989 |
| <b>Melanoma of skin</b>          |                 |            |       |                   |            |       |                        |             |       |
| <b>Glargine vs Human insulin</b> |                 |            |       |                   |            |       |                        |             |       |
| 0-0.5                            | 1.08            | 0.64, 1.83 | 0.774 | 1.05              | 0.60, 1.85 | 0.868 | 1.06                   | 0.58, 1.95  | 0.843 |
| 0.5-1                            | 0.66            | 0.36, 1.22 | 0.185 | 0.63              | 0.32, 1.24 | 0.177 | 0.72                   | 0.35, 1.48  | 0.368 |
| 1-2                              | 1.15            | 0.71, 1.87 | 0.565 | 1.12              | 0.67, 1.87 | 0.677 | 1.22                   | 0.71, 2.12  | 0.468 |
| 2-3                              | 0.79            | 0.44, 1.44 | 0.447 | 0.79              | 0.42, 1.49 | 0.465 | 0.71                   | 0.35, 1.43  | 0.334 |
| 3-4                              | 1.23            | 0.67, 2.27 | 0.503 | 1.37              | 0.72, 2.60 | 0.337 | 1.66                   | 0.83, 3.30  | 0.150 |
| 4-5                              | 0.81            | 0.37, 1.76 | 0.590 | 0.71              | 0.29, 1.71 | 0.443 | 0.44                   | 0.13, 1.48  | 0.184 |
| 5-6                              | 1.63            | 0.54, 4.95 | 0.388 | 1.59              | 0.45, 5.58 | 0.468 | 2.32                   | 0.62, 8.72  | 0.212 |
| >6                               | 1.29            | 0.60, 2.79 | 0.520 | 1.46              | 0.61, 3.53 | 0.396 | 0.90                   | 0.27, 3.02  | 0.869 |
| <b>Glargine vs Detemir</b>       |                 |            |       |                   |            |       |                        |             |       |
| 0-0.5                            | 1.14            | 0.52, 2.52 | 0.737 | 1.12              | 0.48, 2.60 | 0.788 | 1.00                   | 0.42, 2.36  | 0.997 |
| 0.5-1                            | 0.98            | 0.41, 2.34 | 0.971 | 0.92              | 0.36, 2.35 | 0.855 | 0.83                   | 0.32, 2.16  | 0.703 |
| 1-2                              | 0.90            | 0.49, 1.67 | 0.745 | 0.85              | 0.44, 1.62 | 0.621 | 0.97                   | 0.48, 1.97  | 0.939 |
| 2-3                              | 0.76            | 0.32, 1.78 | 0.521 | 0.67              | 0.28, 1.60 | 0.363 | 0.58                   | 0.23, 1.52  | 0.269 |
| 3-4                              | 1.58            | 0.46, 5.43 | 0.469 | 1.45              | 0.42, 5.02 | 0.559 | 1.31                   | 0.38, 4.57  | 0.672 |
| 4-5                              | 0.26            | 0.09, 0.76 | 0.014 | 0.24              | 0.07, 0.85 | 0.028 | 0.12                   | 0.03, 0.52  | 0.005 |
| 5-6                              | NE              | NE         | 0.981 | NE                | NE         | 0.986 | NE                     | NE          | 0.988 |
| >6                               | NE              | NE         | 0.986 | NE                | NE         | 0.994 | NE                     | NE          | 0.996 |
| <b>Detemir vs Human Insulin</b>  |                 |            |       |                   |            |       |                        |             |       |
| 0-0.5                            | 0.94            | 0.46, 1.96 | 0.876 | 0.93              | 0.43, 2.03 | 0.864 | 1.06                   | 0.48, 2.33  | 0.882 |
| 0.5-1                            | 0.67            | 0.31, 1.47 | 0.317 | 0.68              | 0.30, 1.58 | 0.374 | 0.87                   | 0.37, 2.04  | 0.741 |
| 1-2                              | 1.28            | 0.70, 2.32 | 0.423 | 1.31              | 0.70, 2.45 | 0.390 | 1.26                   | 0.63, 2.51  | 0.512 |
| 2-3                              | 1.05            | 0.48, 2.29 | 0.902 | 1.18              | 0.54, 2.61 | 0.677 | 1.21                   | 0.52, 2.81  | 0.662 |
| 3-4                              | 0.78            | 0.24, 2.58 | 0.685 | 0.95              | 0.28, 3.16 | 0.928 | 1.27                   | 0.37, 4.31  | 0.705 |
| 4-5                              | 3.07            | 1.26, 7.46 | 0.013 | 2.95              | 1.02, 8.49 | 0.045 | 3.84                   | 1.31, 11.25 | 0.014 |
| 5-6                              | 0.00            | NE         | 0.982 | 0.00              | NE         | 0.987 | 0.00                   | NE          | 0.988 |
| >6                               | 0.00            | NE         | 0.986 | 0.00              | NE         | 0.994 | 0.00                   | NE          | 0.996 |
| <b>Bladder cancer</b>            |                 |            |       |                   |            |       |                        |             |       |
| <b>Glargine vs Human insulin</b> |                 |            |       |                   |            |       |                        |             |       |
| 0-0.5                            | 1.41            | 0.92, 2.17 | 0.118 | 1.32              | 0.82, 2.13 | 0.249 | 1.32                   | 0.82, 2.13  | 0.260 |
| 0.5-1                            | 0.97            | 0.57, 1.65 | 0.902 | 0.95              | 0.54, 1.70 | 0.875 | 0.89                   | 0.49, 1.64  | 0.714 |
| 1-2                              | 0.76            | 0.46, 1.25 | 0.273 | 0.61              | 0.34, 1.10 | 0.101 | 0.70                   | 0.39, 1.28  | 0.248 |
| 2-3                              | 0.93            | 0.56, 1.52 | 0.764 | 0.97              | 0.57, 1.65 | 0.904 | 1.02                   | 0.58, 1.80  | 0.951 |
| 3-4                              | 0.87            | 0.48, 1.56 | 0.630 | 0.93              | 0.48, 1.79 | 0.819 | 0.86                   | 0.42, 1.76  | 0.672 |
| 4-5                              | 1.68            | 0.87, 3.25 | 0.125 | 1.48              | 0.69, 3.17 | 0.316 | 1.16                   | 0.49, 2.73  | 0.734 |

| Cumulative treatment time, years | Type 2 diabetes |            |       | Nordic population |            |       | Entry from 2000 onward |            |       |
|----------------------------------|-----------------|------------|-------|-------------------|------------|-------|------------------------|------------|-------|
|                                  | RR              | 95% CI     | P     | RR                | 95% CI     | P     | RR                     | 95% CI     | P     |
| 5-6                              | 0.67            | 0.20, 2.25 | 0.514 | 0.74              | 0.17, 3.24 | 0.693 | 0.34                   | 0.05, 2.59 | 0.300 |
| >6                               | 0.59            | 0.18, 1.92 | 0.380 | 0.73              | 0.17, 3.06 | 0.662 | 1.13                   | 0.26, 4.88 | 0.872 |
| <b>Glargine vs Detemir</b>       |                 |            |       |                   |            |       |                        |            |       |
| 0-0.5                            | 1.03            | 0.55, 1.95 | 0.923 | 1.14              | 0.54, 2.40 | 0.722 | 1.27                   | 0.59, 2.75 | 0.540 |
| 0.5-1                            | 1.08            | 0.49, 2.38 | 0.858 | 0.94              | 0.41, 2.12 | 0.877 | 0.82                   | 0.36, 1.90 | 0.650 |
| 1-2                              | 0.55            | 0.29, 1.04 | 0.067 | 0.46              | 0.22, 0.96 | 0.038 | 0.57                   | 0.26, 1.23 | 0.154 |
| 2-3                              | 0.96            | 0.44, 2.08 | 0.917 | 0.94              | 0.41, 2.16 | 0.892 | 0.96                   | 0.40, 2.32 | 0.931 |
| 3-4                              | 0.63            | 0.26, 1.55 | 0.313 | 0.67              | 0.24, 1.92 | 0.459 | 0.69                   | 0.22, 2.22 | 0.536 |
| 4-5                              | 1.56            | 0.35, 6.93 | 0.559 | 0.86              | 0.19, 4.00 | 0.850 | 0.66                   | 0.14, 3.18 | 0.603 |
| 5-6                              | NE              | NE         | 0.981 | NE                | NE         | 0.987 | NE                     | NE         | 0.989 |
| >6                               | NE              | NE         | 0.986 | NE                | NE         | 0.995 | NE                     | NE         | 0.996 |
| <b>Detemir vs Human Insulin</b>  |                 |            |       |                   |            |       |                        |            |       |
| 0-0.5                            | 1.37            | 0.76, 2.46 | 0.300 | 1.16              | 0.58, 2.29 | 0.677 | 1.04                   | 0.51, 2.12 | 0.924 |
| 0.5-1                            | 0.90            | 0.43, 1.86 | 0.775 | 1.02              | 0.49, 2.13 | 0.961 | 1.08                   | 0.51, 2.28 | 0.834 |
| 1-2                              | 1.36            | 0.79, 2.36 | 0.264 | 1.32              | 0.73, 2.40 | 0.359 | 1.23                   | 0.64, 2.38 | 0.536 |
| 2-3                              | 0.97            | 0.47, 1.98 | 0.924 | 1.02              | 0.48, 2.21 | 0.950 | 1.06                   | 0.47, 2.41 | 0.892 |
| 3-4                              | 1.38            | 0.61, 3.08 | 0.439 | 1.38              | 0.53, 3.54 | 0.509 | 1.24                   | 0.43, 3.54 | 0.694 |
| 4-5                              | 1.08            | 0.25, 4.54 | 0.921 | 1.71              | 0.40, 7.27 | 0.465 | 1.76                   | 0.41, 7.56 | 0.445 |
| 5-6                              | 0.00            | NE         | 0.981 | 0.00              | NE         | 0.986 | 0.00                   | NE         | 0.988 |
| >6                               | 0.00            | NE         | 0.986 | 0.00              | NE         | 0.995 | 0.00                   | NE         | 0.996 |
| <b>Colorectal cancer</b>         |                 |            |       |                   |            |       |                        |            |       |
| <b>Glargine vs Human insulin</b> |                 |            |       |                   |            |       |                        |            |       |
| 0-0.5                            | 1.26            | 0.92, 1.73 | 0.145 | 1.16              | 0.82, 1.64 | 0.408 | 1.09                   | 0.76, 1.57 | 0.633 |
| 0.5-1                            | 0.85            | 0.57, 1.26 | 0.411 | 0.89              | 0.58, 1.38 | 0.613 | 0.90                   | 0.57, 1.42 | 0.646 |
| 1-2                              | 0.81            | 0.58, 1.13 | 0.208 | 0.67              | 0.45, 0.98 | 0.039 | 0.63                   | 0.42, 0.96 | 0.032 |
| 2-3                              | 1.09            | 0.77, 1.54 | 0.617 | 1.02              | 0.69, 1.50 | 0.930 | 1.06                   | 0.71, 1.59 | 0.778 |
| 3-4                              | 0.86            | 0.54, 1.37 | 0.519 | 0.74              | 0.43, 1.29 | 0.289 | 0.81                   | 0.46, 1.44 | 0.482 |
| 4-5                              | 1.04            | 0.59, 1.81 | 0.903 | 0.80              | 0.39, 1.62 | 0.531 | 0.80                   | 0.35, 1.79 | 0.582 |
| 5-6                              | 0.68            | 0.29, 1.59 | 0.374 | 0.38              | 0.09, 1.58 | 0.183 | 0.26                   | 0.03, 1.88 | 0.180 |
| >6                               | 0.51            | 0.23, 1.10 | 0.085 | 0.62              | 0.23, 1.72 | 0.362 | 0.38                   | 0.09, 1.57 | 0.183 |
| <b>Glargine vs Detemir</b>       |                 |            |       |                   |            |       |                        |            |       |
| 0-0.5                            | 1.41            | 0.84, 2.37 | 0.189 | 1.31              | 0.74, 2.31 | 0.350 | 1.54                   | 0.82, 2.90 | 0.181 |
| 0.5-1                            | 1.10            | 0.61, 1.99 | 0.743 | 1.10              | 0.58, 2.07 | 0.770 | 0.96                   | 0.50, 1.83 | 0.902 |
| 1-2                              | 1.11            | 0.68, 1.80 | 0.674 | 0.96              | 0.55, 1.68 | 0.894 | 0.78                   | 0.44, 1.39 | 0.403 |
| 2-3                              | 1.17            | 0.68, 2.02 | 0.571 | 1.01              | 0.56, 1.82 | 0.972 | 1.12                   | 0.59, 2.12 | 0.737 |
| 3-4                              | 0.84            | 0.39, 1.82 | 0.655 | 0.72              | 0.29, 1.75 | 0.464 | 0.64                   | 0.26, 1.58 | 0.338 |
| 4-5                              | 0.91            | 0.33, 2.50 | 0.860 | 0.53              | 0.16, 1.74 | 0.297 | 0.52                   | 0.14, 2.03 | 0.351 |
| 5-6                              | 0.72            | 0.14, 3.55 | 0.682 | NE                | NE         | 0.980 | NE                     | NE         | 0.982 |
| >6                               | NE              | NE         | 0.966 | NE                | NE         | 0.991 | NE                     | NE         | 0.993 |
| <b>Detemir vs Human Insulin</b>  |                 |            |       |                   |            |       |                        |            |       |
| 0-0.5                            | 0.89            | 0.55, 1.44 | 0.639 | 0.88              | 0.53, 1.48 | 0.639 | 0.71                   | 0.40, 1.27 | 0.248 |
| 0.5-1                            | 0.77            | 0.45, 1.30 | 0.322 | 0.81              | 0.46, 1.43 | 0.473 | 0.94                   | 0.53, 1.65 | 0.819 |

| Cumulative treatment time, years | Type 2 diabetes |            |       | Nordic population |            |       | Entry from 2000 onward |            |       |
|----------------------------------|-----------------|------------|-------|-------------------|------------|-------|------------------------|------------|-------|
|                                  | RR              | 95% CI     | P     | RR                | 95% CI     | P     | RR                     | 95% CI     | P     |
| 1-2                              | 0.73            | 0.47, 1.14 | 0.162 | 0.69              | 0.42, 1.13 | 0.141 | 0.81                   | 0.49, 1.33 | 0.404 |
| 2-3                              | 0.93            | 0.56, 1.55 | 0.788 | 1.01              | 0.59, 1.73 | 0.981 | 0.95                   | 0.52, 1.72 | 0.865 |
| 3-4                              | 1.02            | 0.51, 2.05 | 0.949 | 1.04              | 0.47, 2.27 | 0.925 | 1.27                   | 0.57, 2.79 | 0.560 |
| 4-5                              | 1.13            | 0.45, 2.84 | 0.790 | 1.49              | 0.54, 4.15 | 0.443 | 1.52                   | 0.47, 4.94 | 0.488 |
| 5-6                              | 0.95            | 0.23, 3.94 | 0.943 | 0.00              | NE         | 0.978 | 0.00                   | NE         | 0.980 |
| >6                               | 0.00            | , NE       | 0.965 | 0.00              | NE         | 0.991 | 0.00                   | NE         | 0.993 |
| <b>Non-Hodgkin's lymphoma</b>    |                 |            |       |                   |            |       |                        |            |       |
| <b>Glargine vs Human insulin</b> |                 |            |       |                   |            |       |                        |            |       |
| 0-0.5                            | 0.66            | 0.34, 1.30 | 0.230 | 0.56              | 0.27, 1.17 | 0.122 | 0.55                   | 0.26, 1.14 | 0.108 |
| 0.5-1                            | 0.96            | 0.46, 2.00 | 0.908 | 0.97              | 0.45, 2.09 | 0.929 | 0.95                   | 0.38, 2.37 | 0.919 |
| 1-2                              | 1.03            | 0.49, 2.17 | 0.939 | 1.13              | 0.51, 2.48 | 0.768 | 1.12                   | 0.51, 2.49 | 0.772 |
| 2-3                              | 0.51            | 0.19, 1.36 | 0.175 | 0.61              | 0.23, 1.68 | 0.342 | 0.77                   | 0.27, 2.17 | 0.621 |
| 3-4                              | 1.21            | 0.58, 2.55 | 0.610 | 0.93              | 0.41, 2.14 | 0.868 | 0.82                   | 0.34, 1.96 | 0.649 |
| 4-5                              | 1.39            | 0.57, 3.36 | 0.471 | 0.89              | 0.30, 2.67 | 0.834 | 0.93                   | 0.31, 2.81 | 0.894 |
| 5-6                              | 0.90            | 0.20, 4.00 | 0.889 | 0.00              | NE         | 0.982 | 0.00                   | NE         | 0.984 |
| >6                               | 1.56            | 0.58, 4.19 | 0.378 | 1.84              | 0.62, 5.46 | 0.274 | 1.67                   | 0.48, 5.83 | 0.425 |
| <b>Glargine vs Detemir</b>       |                 |            |       |                   |            |       |                        |            |       |
| 0-0.5                            | 1.28            | 0.41, 4.07 | 0.671 | 1.04              | 0.32, 3.42 | 0.944 | 1.06                   | 0.32, 3.47 | 0.927 |
| 0.5-1                            | 0.80            | 0.31, 2.09 | 0.648 | 0.73              | 0.27, 1.93 | 0.522 | 0.51                   | 0.18, 1.48 | 0.218 |
| 1-2                              | 0.47            | 0.20, 1.11 | 0.084 | 0.47              | 0.19, 1.15 | 0.099 | 0.53                   | 0.21, 1.33 | 0.175 |
| 2-3                              | 0.24            | 0.08, 0.73 | 0.012 | 0.23              | 0.08, 0.72 | 0.011 | 0.24                   | 0.08, 0.73 | 0.012 |
| 3-4                              | NE              | NE         | 0.964 | NE                | NE         | 0.980 | NE                     | NE         | 0.981 |
| 4-5                              | NE              | NE         | 0.973 | NE                | NE         | 0.986 | NE                     | NE         | 0.987 |
| 5-6                              | NE              | NE         | 0.982 | 0.29              | NE         | 0.999 | 0.29                   | NE         | 0.999 |
| >6                               | NE              | NE         | 0.986 | NE                | NE         | 0.996 | NE                     | NE         | 0.997 |
| <b>Detemir vs Human Insulin</b>  |                 |            |       |                   |            |       |                        |            |       |
| 0-0.5                            | 0.51            | 0.18, 1.46 | 0.212 | 0.54              | 0.19, 1.53 | 0.244 | 0.52                   | 0.18, 1.47 | 0.217 |
| 0.5-1                            | 1.20            | 0.50, 2.87 | 0.686 | 1.33              | 0.55, 3.22 | 0.527 | 1.86                   | 0.74, 4.68 | 0.189 |
| 1-2                              | 2.18            | 1.02, 4.64 | 0.044 | 2.39              | 1.07, 5.33 | 0.034 | 2.12                   | 0.92, 4.88 | 0.078 |
| 2-3                              | 2.13            | 0.92, 4.94 | 0.078 | 2.62              | 1.11, 6.22 | 0.028 | 3.25                   | 1.32, 7.97 | 0.010 |
| 3-4                              | 0.00            | NE         | 0.964 | 0.00              | NE         | 0.980 | 0.00                   | NE         | 0.981 |
| 4-5                              | 0.00            | NE         | 0.974 | 0.00              | NE         | 0.986 | 0.00                   | NE         | 0.987 |
| 5-6                              | 0.00            | NE         | 0.982 | 0.00              | NE         | 0.991 | 0.00                   | NE         | 0.992 |
| >6                               | 0.00            | NE         | 0.987 | 0.00              | NE         | 0.996 | 0.00                   | NE         | 0.997 |
| <b>Prostate cancer</b>           |                 |            |       |                   |            |       |                        |            |       |
| <b>Glargine vs Human insulin</b> |                 |            |       |                   |            |       |                        |            |       |
| 0-0.5                            | 1.07            | 0.86, 1.34 | 0.528 | 1.04              | 0.82, 1.32 | 0.737 | 1.03                   | 0.81, 1.32 | 0.793 |
| 0.5-1                            | 0.93            | 0.71, 1.22 | 0.595 | 0.91              | 0.68, 1.22 | 0.525 | 0.96                   | 0.71, 1.30 | 0.807 |
| 1-2                              | 1.00            | 0.79, 1.27 | 0.979 | 1.02              | 0.80, 1.31 | 0.874 | 1.04                   | 0.8, 1.35  | 0.758 |
| 2-3                              | 0.91            | 0.69, 1.18 | 0.463 | 0.82              | 0.61, 1.10 | 0.178 | 0.74                   | 0.54, 1.03 | 0.079 |
| 3-4                              | 0.98            | 0.72, 1.34 | 0.893 | 0.95              | 0.68, 1.34 | 0.777 | 0.79                   | 0.54, 1.15 | 0.214 |
| 4-5                              | 0.86            | 0.57, 1.29 | 0.462 | 0.93              | 0.60, 1.43 | 0.730 | 0.82                   | 0.51, 1.34 | 0.430 |

| Cumulative treatment time, years | Type 2 diabetes |             |       | Nordic population |            |       | Entry from 2000 onward |            |       |
|----------------------------------|-----------------|-------------|-------|-------------------|------------|-------|------------------------|------------|-------|
|                                  | RR              | 95% CI      | P     | RR                | 95% CI     | P     | RR                     | 95% CI     | P     |
| 5-6                              | 0.91            | 0.55, 1.50  | 0.711 | 0.75              | 0.40, 1.41 | 0.372 | 0.57                   | 0.26, 1.24 | 0.156 |
| >6                               | 0.82            | 0.51, 1.32  | 0.411 | 0.94              | 0.54, 1.63 | 0.833 | 0.91                   | 0.46, 1.80 | 0.784 |
| <b>Glargine vs Detemir</b>       |                 |             |       |                   |            |       |                        |            |       |
| 0-0.5                            | 1.11            | 0.79, 1.56  | 0.534 | 1.11              | 0.77, 1.60 | 0.586 | 1.13                   | 0.77, 1.65 | 0.532 |
| 0.5-1                            | 1.10            | 0.75, 1.63  | 0.617 | 1.02              | 0.68, 1.54 | 0.921 | 1.02                   | 0.67, 1.57 | 0.920 |
| 1-2                              | 1.04            | 0.75, 1.45  | 0.816 | 1.06              | 0.74, 1.51 | 0.747 | 0.99                   | 0.68, 1.43 | 0.953 |
| 2-3                              | 1.03            | 0.68, 1.58  | 0.881 | 0.90              | 0.57, 1.42 | 0.664 | 0.77                   | 0.47, 1.25 | 0.292 |
| 3-4                              | 0.75            | 0.46, 1.23  | 0.259 | 0.70              | 0.41, 1.20 | 0.193 | 0.71                   | 0.38, 1.33 | 0.287 |
| 4-5                              | 1.56            | 0.55, 4.46  | 0.402 | 1.18              | 0.41, 3.38 | 0.762 | 0.86                   | 0.30, 2.53 | 0.791 |
| 5-6                              | 0.69            | 0.23, 2.06  | 0.511 | 0.35              | 0.1, 1.270 | 0.110 | 0.20                   | 0.05, 0.76 | 0.018 |
| >6                               | 0.94            | 0.22, 4.06  | 0.937 | NE                | NE         | 0.953 | NE                     | NE         | 0.964 |
| <b>Detemir vs Human Insulin</b>  |                 |             |       |                   |            |       |                        |            |       |
| 0-0.5                            | 0.96            | 0.71, 1.32  | 0.821 | 0.94              | 0.67, 1.31 | 0.720 | 0.92                   | 0.65, 1.29 | 0.618 |
| 0.5-1                            | 0.84            | 0.59, 1.20  | 0.346 | 0.89              | 0.61, 1.30 | 0.548 | 0.94                   | 0.64, 1.39 | 0.766 |
| 1-2                              | 0.96            | 0.71, 1.32  | 0.820 | 0.96              | 0.69, 1.34 | 0.821 | 1.05                   | 0.75, 1.49 | 0.766 |
| 2-3                              | 0.88            | 0.59, 1.30  | 0.510 | 0.90              | 0.6, 1.370 | 0.629 | 0.97                   | 0.62, 1.50 | 0.890 |
| 3-4                              | 1.30            | 0.83, 2.05  | 0.255 | 1.36              | 0.83, 2.21 | 0.217 | 1.10                   | 0.63, 1.93 | 0.731 |
| 4-5                              | 0.55            | 0.20, 1.49  | 0.239 | 0.79              | 0.29, 2.14 | 0.640 | 0.95                   | 0.35, 2.60 | 0.921 |
| 5-6                              | 1.31            | 0.48, 3.57  | 0.598 | 2.13              | 0.67, 6.77 | 0.199 | 2.92                   | 0.92, 9.31 | 0.070 |
| >6                               | 0.87            | 0.21, 3.52  | 0.843 | 0.00              | NE         | 0.953 | 0.00                   | NE         | 0.963 |
| <b>Any cancer <sup>a</sup></b>   |                 |             |       |                   |            |       |                        |            |       |
| <b>Glargine vs Human insulin</b> |                 |             |       |                   |            |       |                        |            |       |
| 0-0.5                            | 1.09            | 0.99, 1.20  | 0.095 | 1.06              | 0.95, 1.18 | 0.310 | 1.04                   | 0.93, 1.16 | 0.513 |
| 0.5-1                            | 0.88            | 0.77, 1.00  | 0.052 | 0.90              | 0.78, 1.04 | 0.141 | 0.91                   | 0.78, 1.05 | 0.205 |
| 1-2                              | 0.89            | 0.80, 1.00  | 0.053 | 0.84              | 0.74, 0.95 | 0.006 | 0.84                   | 0.73, 0.96 | 0.011 |
| 2-3                              | 0.84            | 0.73, 0.95  | 0.008 | 0.82              | 0.71, 0.94 | 0.006 | 0.81                   | 0.69, 0.95 | 0.008 |
| 3-4                              | 0.91            | 0.78, 1.06  | 0.234 | 0.90              | 0.75, 1.06 | 0.211 | 0.86                   | 0.71, 1.04 | 0.112 |
| 4-5                              | 0.94            | 0.78, 1.14  | 0.528 | 0.83              | 0.66, 1.04 | 0.104 | 0.73                   | 0.56, 0.94 | 0.017 |
| 5-6                              | 0.94            | 0.73, 1.20  | 0.617 | 0.80              | 0.58, 1.10 | 0.176 | 0.82                   | 0.58, 1.16 | 0.263 |
| >6                               | 0.63            | 0.50, 0.80  | 0.000 | 0.74              | 0.55, 0.99 | 0.042 | 0.77                   | 0.54, 1.08 | 0.127 |
| <b>Glargine vs Detemir</b>       |                 |             |       |                   |            |       |                        |            |       |
| 0-0.5                            | 1.23            | 1.05, 1.43  | 0.009 | 1.24              | 1.04, 1.46 | 0.014 | 1.26                   | 1.06, 1.50 | 0.010 |
| 0.5-1                            | 1.05            | 0.87, 1.27  | 0.591 | 1.09              | 0.89, 1.34 | 0.407 | 1.02                   | 0.82, 1.26 | 0.877 |
| 1-2                              | 1.01            | 0.86, 1.18  | 0.934 | 0.99              | 0.83, 1.18 | 0.892 | 0.92                   | 0.76, 1.11 | 0.382 |
| 2-3                              | 1.05            | 0.85, 1.30  | 0.628 | 0.97              | 0.77, 1.21 | 0.757 | 0.94                   | 0.74, 1.20 | 0.611 |
| 3-4                              | 0.86            | 0.67, 1.11  | 0.240 | 0.78              | 0.59, 1.04 | 0.089 | 0.85                   | 0.62, 1.17 | 0.318 |
| 4-5                              | 1.03            | 0.70, 1.51  | 0.881 | 0.79              | 0.50, 1.25 | 0.309 | 0.63                   | 0.39, 1.03 | 0.068 |
| 5-6                              | 1.00            | 0.57, 1.74  | 0.994 | 1.02              | 0.40, 2.57 | 0.969 | 0.75                   | 0.29, 1.91 | 0.546 |
| >6                               | 5.14            | 1.26, 20.93 | 0.022 | NE                | NE         | 0.923 | NE                     | NE         | 0.939 |
| <b>Detemir vs Human Insulin</b>  |                 |             |       |                   |            |       |                        |            |       |
| 0-0.5                            | 0.89            | 0.77, 1.02  | 0.093 | 0.86              | 0.73, 1.00 | 0.050 | 0.82                   | 0.70, 0.97 | 0.019 |
| 0.5-1                            | 0.84            | 0.71, 0.99  | 0.037 | 0.83              | 0.69, 0.99 | 0.041 | 0.89                   | 0.74, 1.08 | 0.243 |

| Cumulative treatment time, years | Type 2 diabetes |            |       | Nordic population |            |       | Entry from 2000 onward |            |       |
|----------------------------------|-----------------|------------|-------|-------------------|------------|-------|------------------------|------------|-------|
|                                  | RR              | 95% CI     | P     | RR                | 95% CI     | P     | RR                     | 95% CI     | P     |
| 1-2                              | 0.89            | 0.77, 1.03 | 0.115 | 0.85              | 0.72, 1.00 | 0.048 | 0.91                   | 0.77, 1.08 | 0.291 |
| 2-3                              | 0.80            | 0.66, 0.96 | 0.020 | 0.85              | 0.69, 1.04 | 0.108 | 0.86                   | 0.69, 1.08 | 0.189 |
| 3-4                              | 1.06            | 0.84, 1.34 | 0.623 | 1.14              | 0.89, 1.48 | 0.302 | 1.01                   | 0.76, 1.35 | 0.944 |
| 4-5                              | 0.91            | 0.64, 1.30 | 0.618 | 1.05              | 0.69, 1.60 | 0.820 | 1.15                   | 0.74, 1.79 | 0.536 |
| 5-6                              | 0.94            | 0.56, 1.58 | 0.818 | 0.79              | 0.33, 1.91 | 0.598 | 1.09                   | 0.45, 2.65 | 0.843 |
| >6                               | 0.12            | 0.03, 0.49 | 0.003 | 0.00              | NE         | 0.921 | 0.00                   | NE         | 0.938 |

<sup>a</sup> Any cancer except non-melanoma skin cancer

Abbreviations: RR – rate ratio, CI – confidence interval, NE – not estimable.



**ESM Table 3.** Results of the sensitivity analyses for women: adjusted (all sites and any cancer: age, calendar time, NIADs, duration of insulin-treated diabetes, country; liver, colorectal, breast, and endometrial cancer: additional adjustment for relevant co-medications) rate ratios (RR) with 95% confidence interval (CI) from four sensitivity analyses for site-specific cancers and any cancer. Pairwise comparisons of glargine, detemir, and human insulin by the cumulative treatment time (years), when restricting the study population (type 2 diabetes, or Nordic countries, or study entry in 2000 or later), or using additional adjustment (menopause status for breast and endometrial cancer).

| Cumulative treatment time        | Type 2 diabetes |            |       | Nordic population |            |       | Entry from 2000 onward |            |       | Adjusted for menopause |        |   |
|----------------------------------|-----------------|------------|-------|-------------------|------------|-------|------------------------|------------|-------|------------------------|--------|---|
|                                  | RR              | 95% CI     | P     | RR                | 95% CI     | P     | RR                     | 95% CI     | P     | RR                     | 95% CI | P |
| <b>Liver cancer</b>              |                 |            |       |                   |            |       |                        |            |       |                        |        |   |
| <b>Glargine vs Human insulin</b> |                 |            |       |                   |            |       |                        |            |       |                        |        |   |
| 0-0.5                            | 1.04            | 0.46, 2.34 | 0.931 | 0.93              | 0.36, 2.38 | 0.881 | 0.78                   | 0.29, 2.11 | 0.626 |                        |        |   |
| 0.5-1                            | 0.46            | 0.14, 1.48 | 0.192 | 0.40              | 0.11, 1.52 | 0.179 | 0.36                   | 0.07, 1.74 | 0.203 |                        |        |   |
| 1-2                              | 0.62            | 0.20, 1.89 | 0.399 | 0.41              | 0.11, 1.61 | 0.202 | 0.43                   | 0.11, 1.65 | 0.217 |                        |        |   |
| 2-3                              | 0.60            | 0.20, 1.82 | 0.371 | 0.71              | 0.22, 2.24 | 0.557 | 0.85                   | 0.26, 2.76 | 0.785 |                        |        |   |
| 3-4                              | 0.51            | 0.16, 1.64 | 0.259 | 0.57              | 0.17, 1.86 | 0.349 | 0.82                   | 0.24, 2.82 | 0.755 |                        |        |   |
| 4-5                              | 0.73            | 0.20, 2.75 | 0.646 | 0.85              | 0.22, 3.32 | 0.816 | 0.59                   | 0.12, 2.81 | 0.503 |                        |        |   |
| 5-6                              | 0.00            | 0.00, 0.00 | NE    | 0.00              | NE         | 0.984 | 0.00                   | NE         | 0.986 |                        |        |   |
| >6                               | 0.57            | 0.12, 2.63 | 0.472 | 0.79              | 0.16, 3.83 | 0.772 | 1.65                   | 0.33, 8.20 | 0.540 |                        |        |   |
| <b>Glargine vs Detemir</b>       |                 |            |       |                   |            |       |                        |            |       |                        |        |   |
| 0-0.5                            | 1.65            | 0.45, 6.12 | 0.453 | 1.75              | 0.36, 8.56 | 0.492 | 1.48                   | 0.29, 7.50 | 0.633 |                        |        |   |
| 0.5-1                            | 1.11            | 0.20, 6.16 | 0.907 | 0.86              | 0.14, 5.25 | 0.871 | 1.15                   | 0.1, 12.85 | 0.912 |                        |        |   |
| 1-2                              | 0.64            | 0.17, 2.45 | 0.514 | 0.53              | 0.1, 2.7   | 0.447 | 0.79                   | 0.13, 4.87 | 0.802 |                        |        |   |
| 2-3                              | 1.06            | 0.20, 5.57 | 0.943 | 1.09              | 0.21, 5.71 | 0.922 | 1.09                   | 0.21, 5.72 | 0.922 |                        |        |   |
| 3-4                              | 0.67            | 0.12, 3.72 | 0.649 | NE                | NE         | 0.981 | NE                     | NE         | 0.982 |                        |        |   |
| 4-5                              | NE              | NE         | 0.984 | NE                | NE         | 0.986 | NE                     | NE         | 0.988 |                        |        |   |
| 5-6                              | 0.58            | NE         | 1.000 | 0.49              | NE         | 1.000 | 0.43                   | NE         | 1.000 |                        |        |   |
| >6                               | NE              | NE         | 0.992 | NE                | NE         | 0.996 | NE                     | NE         | 0.997 |                        |        |   |
| <b>Detemir vs Human Insulin</b>  |                 |            |       |                   |            |       |                        |            |       |                        |        |   |
| 0-0.5                            | 0.63            | 0.18, 2.22 | 0.470 | 0.53              | 0.12, 2.43 | 0.416 | 0.53                   | 0.12, 2.41 | 0.408 |                        |        |   |

| Cumulative treatment time        | Type 2 diabetes |            |       | Nordic population |            |       | Entry from 2000 onward |             |       | Adjusted for menopause |        |   |
|----------------------------------|-----------------|------------|-------|-------------------|------------|-------|------------------------|-------------|-------|------------------------|--------|---|
|                                  | RR              | 95% CI     | P     | RR                | 95% CI     | P     | RR                     | 95% CI      | P     | RR                     | 95% CI | P |
| 0.5-1                            | 0.41            | 0.09, 1.93 | 0.261 | 0.47              | 0.1, 2.24  | 0.341 | 0.31                   | 0.04, 2.59  | 0.281 |                        |        |   |
| 1-2                              | 0.97            | 0.29, 3.26 | 0.956 | 0.78              | 0.2, 3.08  | 0.718 | 0.54                   | 0.11, 2.64  | 0.445 |                        |        |   |
| 2-3                              | 0.57            | 0.12, 2.70 | 0.477 | 0.65              | 0.13, 3.22 | 0.599 | 0.78                   | 0.15, 3.95  | 0.765 |                        |        |   |
| 3-4                              | 0.76            | 0.16, 3.55 | 0.729 | 0.00              | NE         | 0.980 | 0.00                   | NE          | 0.982 |                        |        |   |
| 4-5                              | 0.00            | NE         | 0.983 | 0.00              | NE         | 0.986 | 0.00                   | NE          | 0.987 |                        |        |   |
| 5-6                              | 0.00            | NE         | 0.988 | 0.00              | NE         | 0.991 | 0.00                   | NE          | 0.993 |                        |        |   |
| >6                               | 0.00            | NE         | 0.992 | 0.00              | NE         | 0.996 | 0.00                   | NE          | 0.997 |                        |        |   |
| <b>Pancreatic cancer</b>         |                 |            |       |                   |            |       |                        |             |       |                        |        |   |
| <b>Glargine vs Human insulin</b> |                 |            |       |                   |            |       |                        |             |       |                        |        |   |
| 0-0.5                            | 0.85            | 0.64, 1.12 | 0.243 | 0.84              | 0.61, 1.14 | 0.263 | 0.80                   | 0.59, 1.10  | 0.172 |                        |        |   |
| 0.5-1                            | 0.99            | 0.65, 1.50 | 0.947 | 1.12              | 0.72, 1.73 | 0.622 | 1.23                   | 0.78, 1.94  | 0.380 |                        |        |   |
| 1-2                              | 1.00            | 0.65, 1.53 | 0.995 | 0.88              | 0.54, 1.42 | 0.598 | 1.03                   | 0.62, 1.71  | 0.909 |                        |        |   |
| 2-3                              | 1.36            | 0.74, 2.47 | 0.320 | 1.42              | 0.75, 2.67 | 0.282 | 1.07                   | 0.50, 2.30  | 0.866 |                        |        |   |
| 3-4                              | 0.75            | 0.31, 1.84 | 0.532 | 0.85              | 0.35, 2.10 | 0.729 | 1.56                   | 0.59, 4.11  | 0.366 |                        |        |   |
| 4-5                              | 1.29            | 0.51, 3.23 | 0.592 | 1.58              | 0.62, 4.01 | 0.338 | 1.67                   | 0.59, 4.71  | 0.334 |                        |        |   |
| 5-6                              | 0.62            | 0.14, 2.69 | 0.526 | 0.43              | 0.06, 3.23 | 0.409 | 0.56                   | 0.07, 4.34  | 0.579 |                        |        |   |
| >6                               | 1.02            | 0.31, 3.35 | 0.973 | 0.97              | 0.23, 4.12 | 0.972 | 0.61                   | 0.08, 4.54  | 0.627 |                        |        |   |
| <b>Glargine vs Detemir</b>       |                 |            |       |                   |            |       |                        |             |       |                        |        |   |
| 0-0.5                            | 1.17            | 0.75, 1.82 | 0.484 | 1.39              | 0.83, 2.33 | 0.214 | 1.33                   | 0.79, 2.24  | 0.283 |                        |        |   |
| 0.5-1                            | 1.28            | 0.65, 2.49 | 0.477 | 1.20              | 0.61, 2.37 | 0.599 | 1.14                   | 0.58, 2.27  | 0.700 |                        |        |   |
| 1-2                              | 0.65            | 0.37, 1.13 | 0.129 | 0.51              | 0.28, 0.94 | 0.030 | 0.48                   | 0.26, 0.89  | 0.019 |                        |        |   |
| 2-3                              | 1.55            | 0.51, 4.66 | 0.436 | 1.39              | 0.45, 4.24 | 0.568 | 1.15                   | 0.31, 4.25  | 0.840 |                        |        |   |
| 3-4                              | NE              | NE         | 0.966 | NE                | NE         | 0.970 | NE                     | NE          | 0.972 |                        |        |   |
| 4-5                              | 0.82            | 0.16, 4.09 | 0.809 | 0.72              | 0.14, 3.62 | 0.694 | 1.17                   | 0.14, 10.08 | 0.889 |                        |        |   |
| 5-6                              | NE              | NE         | 0.982 | NE                | NE         | 0.987 | NE                     | NE          | 0.988 |                        |        |   |
| >6                               | 0.40            | 0.04, 3.89 | 0.431 | NE                | NE         | 0.995 | NE                     | NE          | 0.996 |                        |        |   |
| <b>Detemir vs Human Insulin</b>  |                 |            |       |                   |            |       |                        |             |       |                        |        |   |

| Cumulative treatment time        | Type 2 diabetes |             |       | Nordic population |            |       | Entry from 2000 onward |             |       | Adjusted for menopause |        |   |
|----------------------------------|-----------------|-------------|-------|-------------------|------------|-------|------------------------|-------------|-------|------------------------|--------|---|
|                                  | RR              | 95% CI      | P     | RR                | 95% CI     | P     | RR                     | 95% CI      | P     | RR                     | 95% CI | P |
| 0-0.5                            | 0.72            | 0.48, 1.08  | 0.115 | 0.60              | 0.37, 0.97 | 0.038 | 0.60                   | 0.37, 0.97  | 0.039 |                        |        |   |
| 0.5-1                            | 0.77            | 0.42, 1.43  | 0.412 | 0.93              | 0.50, 1.73 | 0.821 | 1.07                   | 0.57, 2.02  | 0.826 |                        |        |   |
| 1-2                              | 1.54            | 0.94, 2.51  | 0.084 | 1.71              | 1.03, 2.84 | 0.037 | 2.14                   | 1.27, 3.61  | 0.004 |                        |        |   |
| 2-3                              | 0.88            | 0.31, 2.49  | 0.803 | 1.02              | 0.36, 2.92 | 0.967 | 0.93                   | 0.28, 3.11  | 0.910 |                        |        |   |
| 3-4                              | 0.00            | NE          | 0.965 | 0.00              | NE         | 0.970 | 0.00                   | NE          | 0.973 |                        |        |   |
| 4-5                              | 1.57            | 0.36, 6.79  | 0.547 | 2.18              | 0.5, 9.56  | 0.301 | 1.43                   | 0.18, 11.10 | 0.732 |                        |        |   |
| 5-6                              | 0.00            | NE          | 0.981 | 0.00              | NE         | 0.986 | 0.00                   | NE          | 0.988 |                        |        |   |
| >6                               | 2.54            | 0.34, 18.83 | 0.363 | 0.00              | NE         | 0.995 | 0.00                   | NE          | 0.995 |                        |        |   |
| <b>Lung cancer</b>               |                 |             |       |                   |            |       |                        |             |       |                        |        |   |
| <b>Glargine vs Human insulin</b> |                 |             |       |                   |            |       |                        |             |       |                        |        |   |
| 0-0.5                            | 1.27            | 0.83, 1.95  | 0.278 | 1.34              | 0.84, 2.15 | 0.221 | 1.18                   | 0.72, 1.93  | 0.502 |                        |        |   |
| 0.5-1                            | 1.21            | 0.67, 2.18  | 0.530 | 1.45              | 0.76, 2.78 | 0.265 | 1.44                   | 0.71, 2.91  | 0.310 |                        |        |   |
| 1-2                              | 0.84            | 0.52, 1.37  | 0.488 | 0.69              | 0.37, 1.29 | 0.247 | 0.72                   | 0.36, 1.42  | 0.340 |                        |        |   |
| 2-3                              | 0.75            | 0.40, 1.40  | 0.364 | 0.55              | 0.24, 1.24 | 0.152 | 0.41                   | 0.16, 1.06  | 0.065 |                        |        |   |
| 3-4                              | 1.08            | 0.52, 2.24  | 0.828 | 1.46              | 0.65, 3.29 | 0.360 | 1.42                   | 0.59, 3.38  | 0.433 |                        |        |   |
| 4-5                              | 2.09            | 1.01, 4.34  | 0.048 | 2.83              | 1.31, 6.09 | 0.008 | 2.86                   | 1.27, 6.44  | 0.011 |                        |        |   |
| 5-6                              | 1.68            | 0.72, 3.92  | 0.231 | 1.33              | 0.39, 4.49 | 0.646 | 0.68                   | 0.09, 5.18  | 0.712 |                        |        |   |
| >6                               | 0.47            | 0.14, 1.53  | 0.208 | 0.97              | 0.23, 4.10 | 0.966 | 1.20                   | 0.28, 5.11  | 0.809 |                        |        |   |
| <b>Glargine vs Detemir</b>       |                 |             |       |                   |            |       |                        |             |       |                        |        |   |
| 0-0.5                            | 0.98            | 0.54, 1.77  | 0.935 | 0.99              | 0.51, 1.92 | 0.978 | 0.92                   | 0.46, 1.82  | 0.812 |                        |        |   |
| 0.5-1                            | 1.34            | 0.57, 3.15  | 0.501 | 1.34              | 0.53, 3.37 | 0.536 | 1.25                   | 0.46, 3.39  | 0.657 |                        |        |   |
| 1-2                              | 1.99            | 0.85, 4.69  | 0.114 | 1.29              | 0.48, 3.45 | 0.607 | 1.22                   | 0.42, 3.55  | 0.719 |                        |        |   |
| 2-3                              | 0.69            | 0.29, 1.63  | 0.399 | 0.69              | 0.22, 2.20 | 0.532 | 0.56                   | 0.15, 2.11  | 0.392 |                        |        |   |
| 3-4                              | 0.52            | 0.20, 1.33  | 0.174 | 0.52              | 0.18, 1.52 | 0.232 | 0.41                   | 0.14, 1.22  | 0.109 |                        |        |   |
| 4-5                              | NE              | NE          | 0.958 | NE                | NE         | 0.965 | NE                     | NE          | 0.967 |                        |        |   |
| 5-6                              | 2.27            | 0.28, 18.52 | 0.445 | NE                | NE         | 0.978 | NE                     | NE          | 0.982 |                        |        |   |
| >6                               | 0.60            | 0.06, 5.82  | 0.662 | NE                | NE         | 0.991 | NE                     | NE          | 0.993 |                        |        |   |

| Cumulative treatment time        | Type 2 diabetes |             |       | Nordic population |             |       | Entry from 2000 onward |             |       | Adjusted for menopause |        |   |
|----------------------------------|-----------------|-------------|-------|-------------------|-------------|-------|------------------------|-------------|-------|------------------------|--------|---|
|                                  | RR              | 95% CI      | P     | RR                | 95% CI      | P     | RR                     | 95% CI      | P     | RR                     | 95% CI | P |
| <b>Detemir vs Human Insulin</b>  |                 |             |       |                   |             |       |                        |             |       |                        |        |   |
| 0-0.5                            | 1.30            | 0.77, 2.21  | 0.332 | 1.36              | 0.76, 2.42  | 0.304 | 1.28                   | 0.71, 2.33  | 0.411 |                        |        |   |
| 0.5-1                            | 0.90            | 0.41, 1.97  | 0.794 | 1.08              | 0.47, 2.51  | 0.855 | 1.15                   | 0.46, 2.85  | 0.765 |                        |        |   |
| 1-2                              | 0.42            | 0.19, 0.94  | 0.034 | 0.53              | 0.22, 1.27  | 0.155 | 0.59                   | 0.23, 1.52  | 0.274 |                        |        |   |
| 2-3                              | 1.08            | 0.52, 2.26  | 0.829 | 0.80              | 0.31, 2.06  | 0.641 | 0.73                   | 0.26, 2.09  | 0.561 |                        |        |   |
| 3-4                              | 2.08            | 0.94, 4.62  | 0.073 | 2.80              | 1.12, 7.01  | 0.027 | 3.48                   | 1.37, 8.83  | 0.009 |                        |        |   |
| 4-5                              | 0.00            | NE          | 0.960 | 0.00              | NE          | 0.967 | 0.00                   | NE          | 0.970 |                        |        |   |
| 5-6                              | 0.74            | 0.10, 5.52  | 0.769 | 0.00              | NE          | 0.979 | 0.00                   | NE          | 0.981 |                        |        |   |
| >6                               | 0.78            | 0.11, 5.72  | 0.804 | 0.00              | NE          | 0.991 | 0.00                   | NE          | 0.993 |                        |        |   |
| <b>Melanoma of skin</b>          |                 |             |       |                   |             |       |                        |             |       |                        |        |   |
| <b>Glargine vs Human insulin</b> |                 |             |       |                   |             |       |                        |             |       |                        |        |   |
| 0-0.5                            | 1.58            | 0.88, 2.82  | 0.126 | 1.62              | 0.89, 2.92  | 0.113 | 1.52                   | 0.82, 2.83  | 0.182 |                        |        |   |
| 0.5-1                            | 1.15            | 0.59, 2.24  | 0.688 | 1.07              | 0.54, 2.10  | 0.849 | 1.22                   | 0.61, 2.44  | 0.567 |                        |        |   |
| 1-2                              | 1.28            | 0.70, 2.32  | 0.420 | 1.21              | 0.65, 2.24  | 0.552 | 1.30                   | 0.68, 2.46  | 0.423 |                        |        |   |
| 2-3                              | 1.81            | 0.95, 3.44  | 0.071 | 1.58              | 0.81, 3.12  | 0.182 | 1.26                   | 0.61, 2.57  | 0.532 |                        |        |   |
| 3-4                              | 0.72            | 0.29, 1.79  | 0.477 | 0.50              | 0.17, 1.47  | 0.205 | 0.46                   | 0.13, 1.60  | 0.224 |                        |        |   |
| 4-5                              | 3.60            | 1.70, 7.59  | 0.001 | 3.74              | 1.74, 8.02  | 0.001 | 4.63                   | 1.88, 11.43 | 0.001 |                        |        |   |
| 5-6                              | 1.18            | 0.34, 4.08  | 0.792 | 0.85              | 0.19, 3.71  | 0.824 | 1.08                   | 0.24, 4.86  | 0.916 |                        |        |   |
| >6                               | 1.50            | 0.51, 4.37  | 0.461 | 1.39              | 0.41, 4.74  | 0.594 | 2.86                   | 0.8, 10.26  | 0.107 |                        |        |   |
| <b>Glargine vs Detemir</b>       |                 |             |       |                   |             |       |                        |             |       |                        |        |   |
| 0-0.5                            | 0.93            | 0.44, 1.98  | 0.855 | 1.05              | 0.48, 2.30  | 0.900 | 0.93                   | 0.42, 2.07  | 0.860 |                        |        |   |
| 0.5-1                            | 1.72            | 0.61, 4.80  | 0.303 | 2.24              | 0.73, 6.85  | 0.159 | 4.40                   | 0.99, 19.53 | 0.051 |                        |        |   |
| 1-2                              | 1.23            | 0.53, 2.85  | 0.623 | 1.37              | 0.56, 3.32  | 0.488 | 1.74                   | 0.63, 4.78  | 0.281 |                        |        |   |
| 2-3                              | 1.80            | 0.60, 5.39  | 0.291 | 1.64              | 0.54, 4.97  | 0.380 | 1.68                   | 0.47, 5.94  | 0.424 |                        |        |   |
| 3-4                              | 1.87            | 0.22, 15.65 | 0.562 | 1.25              | 0.14, 11.25 | 0.843 | 0.88                   | 0.09, 8.55  | 0.915 |                        |        |   |
| 4-5                              | 0.96            | 0.27, 3.41  | 0.950 | 1.31              | 0.29, 5.89  | 0.722 | 0.94                   | 0.20, 4.34  | 0.935 |                        |        |   |
| 5-6                              | 0.54            | 0.06, 5.25  | 0.595 | 0.28              | 0.02, 3.16  | 0.304 | 0.22                   | 0.02, 2.51  | 0.223 |                        |        |   |

| Cumulative treatment time        | Type 2 diabetes |             |       | Nordic population |             |       | Entry from 2000 onward |             |       | Adjusted for menopause |        |   |
|----------------------------------|-----------------|-------------|-------|-------------------|-------------|-------|------------------------|-------------|-------|------------------------|--------|---|
|                                  | RR              | 95% CI      | P     | RR                | 95% CI      | P     | RR                     | 95% CI      | P     | RR                     | 95% CI | P |
| >6                               | NE              | NE          | 0.971 | NE                | NE          | 0.971 | NE                     | NE          | 0.976 |                        |        |   |
| <b>Detemir vs Human Insulin</b>  |                 |             |       |                   |             |       |                        |             |       |                        |        |   |
| 0-0.5                            | 1.69            | 0.83, 3.45  | 0.149 | 1.54              | 0.73, 3.24  | 0.260 | 1.64                   | 0.77, 3.48  | 0.199 |                        |        |   |
| 0.5-1                            | 0.67            | 0.25, 1.80  | 0.424 | 0.48              | 0.16, 1.42  | 0.183 | 0.28                   | 0.06, 1.21  | 0.088 |                        |        |   |
| 1-2                              | 1.04            | 0.46, 2.33  | 0.934 | 0.88              | 0.37, 2.09  | 0.776 | 0.75                   | 0.28, 2.01  | 0.561 |                        |        |   |
| 2-3                              | 1.00            | 0.34, 2.98  | 0.995 | 0.97              | 0.32, 2.89  | 0.950 | 0.75                   | 0.22, 2.58  | 0.648 |                        |        |   |
| 3-4                              | 0.38            | 0.05, 2.88  | 0.351 | 0.40              | 0.05, 3.00  | 0.371 | 0.52                   | 0.07, 4.01  | 0.534 |                        |        |   |
| 4-5                              | 3.75            | 1.06, 13.18 | 0.040 | 2.85              | 0.63, 12.8  | 0.172 | 4.94                   | 1.05, 23.29 | 0.044 |                        |        |   |
| 5-6                              | 2.19            | 0.28, 16.88 | 0.452 | 3.01              | 0.39, 23.46 | 0.293 | 4.91                   | 0.62, 39.00 | 0.132 |                        |        |   |
| >6                               | 0.00            | NE          | 0.972 | 0.00              | NE          | 0.972 | 0.00                   | NE          | 0.978 |                        |        |   |
| <b>Bladder cancer</b>            |                 |             |       |                   |             |       |                        |             |       |                        |        |   |
| <b>Glargine vs Human insulin</b> |                 |             |       |                   |             |       |                        |             |       |                        |        |   |
| 0-0.5                            | 1.51            | 0.64, 3.56  | 0.345 | 1.20              | 0.48, 2.96  | 0.701 | 1.53                   | 0.60, 3.92  | 0.374 |                        |        |   |
| 0.5-1                            | 2.96            | 0.91, 9.64  | 0.072 | 2.57              | 0.77, 8.54  | 0.123 | 2.52                   | 0.76, 8.32  | 0.129 |                        |        |   |
| 1-2                              | 0.86            | 0.30, 2.51  | 0.785 | 0.74              | 0.25, 2.21  | 0.585 | 0.17                   | 0.02, 1.32  | 0.089 |                        |        |   |
| 2-3                              | 0.66            | 0.21, 2.04  | 0.474 | 0.55              | 0.15, 2.02  | 0.370 | 0.41                   | 0.09, 1.87  | 0.247 |                        |        |   |
| 3-4                              | 0.78            | 0.16, 3.66  | 0.749 | 0.82              | 0.16, 4.12  | 0.809 | 0.80                   | 0.16, 3.97  | 0.785 |                        |        |   |
| 4-5                              | 1.24            | 0.26, 5.94  | 0.791 | 1.00              | 0.20, 5.07  | 0.996 | 1.63                   | 0.31, 8.55  | 0.562 |                        |        |   |
| 5-6                              | 1.97            | 0.41, 9.47  | 0.495 | 0.81              | 0.10, 6.83  | 0.843 | 2.97                   | 0.29, 30.24 | 0.359 |                        |        |   |
| >6                               | 0.72            | 0.09, 5.59  | 0.752 | 1.19              | 0.15, 9.74  | 0.869 | 0.00                   | NE          | 0.992 |                        |        |   |
| <b>Glargine vs Detemir</b>       |                 |             |       |                   |             |       |                        |             |       |                        |        |   |
| 0-0.5                            | 1.62            | 0.34, 7.79  | 0.545 | 1.53              | 0.31, 7.56  | 0.603 | 3.05                   | 0.37, 25.33 | 0.303 |                        |        |   |
| 0.5-1                            | 1.44            | 0.28, 7.31  | 0.658 | 1.58              | 0.31, 8.10  | 0.580 | 1.53                   | 0.30, 7.83  | 0.611 |                        |        |   |
| 1-2                              | 0.76            | 0.18, 3.30  | 0.713 | 0.81              | 0.19, 3.56  | 0.785 | 0.46                   | 0.03, 7.61  | 0.591 |                        |        |   |
| 2-3                              | 1.41            | 0.16, 12.82 | 0.759 | 1.13              | 0.12, 11.02 | 0.919 | 0.71                   | 0.06, 7.96  | 0.782 |                        |        |   |
| 3-4                              | 0.59            | 0.05, 6.59  | 0.668 | NE                | NE          | 0.988 | NE                     | NE          | 0.989 |                        |        |   |
| 4-5                              | NE              | NE          | 0.990 | NE                | NE          | 0.991 | NE                     | NE          | 0.992 |                        |        |   |

| Cumulative treatment time        | Type 2 diabetes |             |       | Nordic population |            |       | Entry from 2000 onward |            |       | Adjusted for menopause |        |   |
|----------------------------------|-----------------|-------------|-------|-------------------|------------|-------|------------------------|------------|-------|------------------------|--------|---|
|                                  | RR              | 95% CI      | P     | RR                | 95% CI     | P     | RR                     | 95% CI     | P     | RR                     | 95% CI | P |
| 5-6                              | NE              | NE          | 0.992 | NE                | NE         | 0.994 | NE                     | NE         | 0.995 |                        |        |   |
| >6                               | NE              | NE          | 0.995 | NE                | NE         | 0.998 | 0.18                   | NE         | 1.000 |                        |        |   |
| <b>Detemir vs Human Insulin</b>  |                 |             |       |                   |            |       |                        |            |       |                        |        |   |
| 0-0.5                            | 0.93            | 0.21, 4.12  | 0.925 | 0.78              | 0.17, 3.50 | 0.75  | 0.50                   | 0.06, 3.94 | 0.51  |                        |        |   |
| 0.5-1                            | 2.05            | 0.39, 10.68 | 0.394 | 1.62              | 0.31, 8.60 | 0.57  | 1.65                   | 0.31, 8.73 | 0.56  |                        |        |   |
| 1-2                              | 1.13            | 0.31, 4.20  | 0.850 | 0.90              | 0.24, 3.44 | 0.88  | 0.36                   | 0.04, 2.89 | 0.33  |                        |        |   |
| 2-3                              | 0.47            | 0.06, 3.65  | 0.469 | 0.49              | 0.06, 3.92 | 0.50  | 0.57                   | 0.07, 4.58 | 0.60  |                        |        |   |
| 3-4                              | 1.32            | 0.16, 10.71 | 0.797 | 0.00              | NE         | 0.99  | 0.00                   | NE         | 0.99  |                        |        |   |
| 4-5                              | 0.00            | NE          | 0.990 | 0.00              | NE         | 0.99  | 0.00                   | NE         | 0.99  |                        |        |   |
| 5-6                              | 0.00            | NE          | 0.993 | 0.00              | NE         | 0.99  | 0.00                   | NE         | 1.00  |                        |        |   |
| >6                               | 0.00            | NE          | 0.995 | 0.00              | NE         | 1.00  | 0.00                   | NE         | 1.00  |                        |        |   |
| <b>Colorectal cancer</b>         |                 |             |       |                   |            |       |                        |            |       |                        |        |   |
| <b>Glargine vs Human insulin</b> |                 |             |       |                   |            |       |                        |            |       |                        |        |   |
| 0-0.5                            | 1.50            | 1.03, 2.2   | 0.036 | 1.50              | 1.00, 2.24 | 0.050 | 1.31                   | 0.86, 1.99 | 0.212 |                        |        |   |
| 0.5-1                            | 0.80            | 0.46, 1.40  | 0.436 | 0.73              | 0.40, 1.34 | 0.309 | 0.69                   | 0.35, 1.37 | 0.292 |                        |        |   |
| 1-2                              | 1.06            | 0.69, 1.61  | 0.793 | 1.06              | 0.68, 1.67 | 0.789 | 1.08                   | 0.67, 1.74 | 0.763 |                        |        |   |
| 2-3                              | 1.20            | 0.75, 1.93  | 0.451 | 0.91              | 0.52, 1.58 | 0.727 | 1.03                   | 0.56, 1.88 | 0.923 |                        |        |   |
| 3-4                              | 0.63            | 0.31, 1.29  | 0.209 | 0.52              | 0.22, 1.24 | 0.141 | 0.57                   | 0.24, 1.37 | 0.212 |                        |        |   |
| 4-5                              | 1.16            | 0.58, 2.33  | 0.682 | 1.42              | 0.70, 2.89 | 0.329 | 1.87                   | 0.90, 3.89 | 0.094 |                        |        |   |
| 5-6                              | 0.78            | 0.28, 2.21  | 0.646 | 0.81              | 0.25, 2.66 | 0.728 | 0.33                   | 0.04, 2.45 | 0.278 |                        |        |   |
| >6                               | 0.58            | 0.21, 1.61  | 0.295 | 0.99              | 0.36, 2.75 | 0.981 | 1.00                   | 0.31, 3.27 | 0.995 |                        |        |   |
| <b>Glargine vs Detemir</b>       |                 |             |       |                   |            |       |                        |            |       |                        |        |   |
| 0-0.5                            | 1.89            | 0.96, 3.71  | 0.064 | 1.71              | 0.86, 3.40 | 0.124 | 1.48                   | 0.74, 2.96 | 0.274 |                        |        |   |
| 0.5-1                            | 0.44            | 0.23, 0.84  | 0.013 | 0.47              | 0.23, 0.96 | 0.038 | 0.40                   | 0.18, 0.88 | 0.024 |                        |        |   |
| 1-2                              | 1.63            | 0.79, 3.33  | 0.183 | 2.13              | 0.92, 4.89 | 0.076 | 2.05                   | 0.84, 5.05 | 0.117 |                        |        |   |
| 2-3                              | 1.45            | 0.63, 3.37  | 0.387 | 1.13              | 0.44, 2.89 | 0.794 | 1.14                   | 0.41, 3.16 | 0.800 |                        |        |   |
| 3-4                              | 0.35            | 0.14, 0.93  | 0.034 | 0.45              | 0.13, 1.61 | 0.219 | 0.42                   | 0.12, 1.50 | 0.183 |                        |        |   |

| Cumulative treatment time        | Type 2 diabetes |            |       | Nordic population |             |       | Entry from 2000 onward |             |       | Adjusted for menopause |        |   |
|----------------------------------|-----------------|------------|-------|-------------------|-------------|-------|------------------------|-------------|-------|------------------------|--------|---|
|                                  | RR              | 95% CI     | P     | RR                | 95% CI      | P     | RR                     | 95% CI      | P     | RR                     | 95% CI | P |
| 4-5                              | 0.62            | 0.19, 1.99 | 0.424 | 1.09              | 0.24, 4.98  | 0.915 | 1.01                   | 0.22, 4.62  | 0.992 |                        |        |   |
| 5-6                              | 0.29            | 0.06, 1.31 | 0.107 | 0.24              | 0.04, 1.43  | 0.116 | 0.07                   | 0.01, 0.73  | 0.027 |                        |        |   |
| >6                               | 0.54            | 0.06, 4.88 | 0.585 | NE                | NE          | 0.994 | NE                     | NE          | 0.995 |                        |        |   |
| <b>Detemir vs Human Insulin</b>  |                 |            |       |                   |             |       |                        |             |       |                        |        |   |
| 0-0.5                            | 0.80            | 0.42, 1.51 | 0.48  | 0.87              | 0.46, 1.67  | 0.685 | 0.89                   | 0.46, 1.69  | 0.716 |                        |        |   |
| 0.5-1                            | 1.82            | 1.08, 3.09 | 0.03  | 1.56              | 0.88, 2.78  | 0.128 | 1.74                   | 0.94, 3.22  | 0.077 |                        |        |   |
| 1-2                              | 0.65            | 0.33, 1.28 | 0.21  | 0.50              | 0.23, 1.11  | 0.089 | 0.52                   | 0.22, 1.24  | 0.140 |                        |        |   |
| 2-3                              | 0.83            | 0.37, 1.84 | 0.64  | 0.80              | 0.34, 1.89  | 0.609 | 0.90                   | 0.35, 2.32  | 0.832 |                        |        |   |
| 3-4                              | 1.78            | 0.83, 3.82 | 0.14  | 1.16              | 0.41, 3.28  | 0.780 | 1.36                   | 0.48, 3.88  | 0.562 |                        |        |   |
| 4-5                              | 1.86            | 0.66, 5.26 | 0.24  | 1.31              | 0.31, 5.50  | 0.712 | 1.85                   | 0.44, 7.88  | 0.403 |                        |        |   |
| 5-6                              | 2.70            | 0.82, 8.90 | 0.10  | 3.43              | 0.81, 14.63 | 0.095 | 5.05                   | 1.17, 21.82 | 0.030 |                        |        |   |
| >6                               | 1.07            | 0.15, 7.83 | 0.95  | 0.00              | NE          | 0.994 | 0.00                   | NE          | 0.995 |                        |        |   |
| <b>Non, Hodgkin's lymphoma</b>   |                 |            |       |                   |             |       |                        |             |       |                        |        |   |
| <b>Glargine vs Human insulin</b> |                 |            |       |                   |             |       |                        |             |       |                        |        |   |
| 0-0.5                            | 0.69            | 0.33, 1.44 | 0.325 | 0.82              | 0.39, 1.73  | 0.606 | 0.84                   | 0.38, 1.83  | 0.659 |                        |        |   |
| 0.5-1                            | 1.28            | 0.55, 2.97 | 0.572 | 1.24              | 0.49, 3.14  | 0.653 | 1.39                   | 0.54, 3.55  | 0.497 |                        |        |   |
| 1-2                              | 1.00            | 0.46, 2.14 | 0.995 | 0.79              | 0.33, 1.89  | 0.598 | 0.91                   | 0.37, 2.19  | 0.827 |                        |        |   |
| 2-3                              | 1.27            | 0.59, 2.76 | 0.543 | 1.00              | 0.42, 2.39  | 0.994 | 1.04                   | 0.41, 2.65  | 0.933 |                        |        |   |
| 3-4                              | 0.80            | 0.26, 2.49 | 0.705 | 0.83              | 0.23, 3.00  | 0.770 | 1.00                   | 0.27, 3.74  | 0.997 |                        |        |   |
| 4-5                              | 1.05            | 0.34, 3.26 | 0.934 | 0.33              | 0.04, 2.57  | 0.291 | 0.43                   | 0.05, 3.38  | 0.420 |                        |        |   |
| 5-6                              | 1.45            | 0.29, 7.18 | 0.648 | 0.95              | 0.11, 7.93  | 0.961 | 0.92                   | 0.11, 7.76  | 0.941 |                        |        |   |
| >6                               | 0.29            | 0.04, 2.22 | 0.234 | 0.50              | 0.06, 3.85  | 0.506 | 0.84                   | 0.11, 6.66  | 0.868 |                        |        |   |
| <b>Glargine vs Detemir</b>       |                 |            |       |                   |             |       |                        |             |       |                        |        |   |
| 0-0.5                            | 0.80            | 0.29, 2.24 | 0.670 | 0.94              | 0.31, 2.80  | 0.907 | 0.84                   | 0.27, 2.56  | 0.756 |                        |        |   |
| 0.5-1                            | 1.11            | 0.37, 3.33 | 0.849 | 0.87              | 0.28, 2.74  | 0.817 | 0.88                   | 0.28, 2.76  | 0.825 |                        |        |   |
| 1-2                              | 0.75            | 0.29, 1.99 | 0.567 | 0.76              | 0.24, 2.36  | 0.630 | 0.75                   | 0.24, 2.36  | 0.621 |                        |        |   |
| 2-3                              | 1.09            | 0.34, 3.48 | 0.878 | 0.78              | 0.23, 2.63  | 0.691 | 1.35                   | 0.28, 6.58  | 0.710 |                        |        |   |

| Cumulative treatment time        | Type 2 diabetes |             |       | Nordic population |             |       | Entry from 2000 onward |             |       | Adjusted for menopause |            |       |
|----------------------------------|-----------------|-------------|-------|-------------------|-------------|-------|------------------------|-------------|-------|------------------------|------------|-------|
|                                  | RR              | 95% CI      | P     | RR                | 95% CI      | P     | RR                     | 95% CI      | P     | RR                     | 95% CI     | P     |
| 3-4                              | 0.64            | 0.12, 3.52  | 0.607 | 0.86              | 0.09, 8.28  | 0.894 | NE                     | NE          | 0.982 |                        |            |       |
| 4-5                              | NE              | NE          | 0.983 | NE                | NE          | 0.987 | NE                     | NE          | 0.988 |                        |            |       |
| 5-6                              | 0.46            | 0.04, 5.13  | 0.527 | 0.14              | 0.01, 2.22  | 0.161 | 0.13                   | 0.01, 2.18  | 0.155 |                        |            |       |
| >6                               | NE              | NE          | 0.992 | NE                | NE          | 0.997 | NE                     | NE          | 0.997 |                        |            |       |
| <b>Detemir vs Human Insulin</b>  |                 |             |       |                   |             |       |                        |             |       |                        |            |       |
| 0-0.5                            | 0.87            | 0.35, 2.13  | 0.76  | 0.88              | 0.33, 2.34  | 0.793 | 1.00                   | 0.37, 2.69  | 1.000 |                        |            |       |
| 0.5-1                            | 1.15            | 0.40, 3.31  | 0.80  | 1.42              | 0.48, 4.20  | 0.531 | 1.58                   | 0.53, 4.73  | 0.416 |                        |            |       |
| 1-2                              | 1.32            | 0.54, 3.25  | 0.54  | 1.05              | 0.37, 2.95  | 0.931 | 1.21                   | 0.42, 3.46  | 0.722 |                        |            |       |
| 2-3                              | 1.16            | 0.38, 3.54  | 0.79  | 1.28              | 0.41, 3.96  | 0.674 | 0.77                   | 0.17, 3.49  | 0.735 |                        |            |       |
| 3-4                              | 1.26            | 0.28, 5.68  | 0.77  | 0.96              | 0.12, 7.60  | 0.972 | 0.00                   | NE          | 0.982 |                        |            |       |
| 4-5                              | 0.00            | NE          | 0.98  | 0.00              | NE          | 0.986 | 0.00                   | NE          | 0.988 |                        |            |       |
| 5-6                              | 3.16            | 0.37, 26.69 | 0.29  | 7.00              | 0.81, 60.37 | 0.077 | 7.20                   | 0.82, 63.09 | 0.074 |                        |            |       |
| >6                               | 0.00            | NE          | 0.99  | 0.00              | NE          | 0.997 | 0.00                   | NE          | 0.997 |                        |            |       |
| <b>Breast cancer</b>             |                 |             |       |                   |             |       |                        |             |       |                        |            |       |
| <b>Glargine vs Human insulin</b> |                 |             |       |                   |             |       |                        |             |       |                        |            |       |
| 0-0.5                            | 1.31            | 0.97, 1.78  | 0.076 | 1.24              | 0.88, 1.74  | 0.222 | 1.31                   | 0.92, 1.87  | 0.128 | 1.32                   | 0.98, 1.78 | 0.070 |
| 0.5-1                            | 1.34            | 0.96, 1.88  | 0.085 | 1.21              | 0.83, 1.76  | 0.332 | 1.08                   | 0.72, 1.63  | 0.717 | 1.32                   | 0.95, 1.85 | 0.102 |
| 1-2                              | 1.22            | 0.91, 1.63  | 0.188 | 1.14              | 0.81, 1.58  | 0.451 | 1.16                   | 0.81, 1.64  | 0.416 | 1.17                   | 0.88, 1.57 | 0.278 |
| 2-3                              | 1.09            | 0.78, 1.52  | 0.611 | 1.15              | 0.80, 1.66  | 0.437 | 1.27                   | 0.86, 1.86  | 0.232 | 1.08                   | 0.78, 1.49 | 0.654 |
| 3-4                              | 0.84            | 0.54, 1.28  | 0.414 | 0.85              | 0.53, 1.37  | 0.509 | 0.81                   | 0.49, 1.34  | 0.412 | 0.86                   | 0.56, 1.30 | 0.469 |
| 4-5                              | 1.09            | 0.67, 1.75  | 0.736 | 1.00              | 0.58, 1.72  | 0.991 | 1.11                   | 0.61, 2.00  | 0.731 | 1.04                   | 0.65, 1.68 | 0.862 |
| 5-6                              | 0.98            | 0.53, 1.82  | 0.954 | 0.63              | 0.25, 1.58  | 0.326 | 0.51                   | 0.16, 1.66  | 0.266 | 0.96                   | 0.52, 1.78 | 0.898 |
| >6                               | 1.13            | 0.68, 1.89  | 0.641 | 1.31              | 0.68, 2.53  | 0.425 | 1.45                   | 0.69, 3.03  | 0.325 | 1.10                   | 0.66, 1.84 | 0.721 |
| <b>Glargine vs Detemir</b>       |                 |             |       |                   |             |       |                        |             |       |                        |            |       |
| 0-0.5                            | 1.42            | 0.88, 2.32  | 0.153 | 1.15              | 0.69, 1.93  | 0.588 | 1.22                   | 0.71, 2.08  | 0.469 | 1.43                   | 0.88, 2.32 | 0.151 |
| 0.5-1                            | 1.33            | 0.82, 2.15  | 0.245 | 1.23              | 0.72, 2.09  | 0.447 | 1.17                   | 0.66, 2.09  | 0.597 | 1.28                   | 0.80, 2.05 | 0.308 |
| 1-2                              | 1.00            | 0.67, 1.49  | 0.989 | 1.04              | 0.66, 1.64  | 0.867 | 1.06                   | 0.65, 1.74  | 0.803 | 0.95                   | 0.64, 1.41 | 0.812 |



| Cumulative treatment time        | Type 2 diabetes |             |       | Nordic population |            |       | Entry from 2000 onward |             |       | Adjusted for menopause |            |       |
|----------------------------------|-----------------|-------------|-------|-------------------|------------|-------|------------------------|-------------|-------|------------------------|------------|-------|
|                                  | RR              | 95% CI      | P     | RR                | 95% CI     | P     | RR                     | 95% CI      | P     | RR                     | 95% CI     | P     |
| 2-3                              | 1.19            | 0.70, 2.03  | 0.517 | 1.31              | 0.72, 2.36 | 0.375 | 1.30                   | 0.69, 2.45  | 0.410 | 1.16                   | 0.69, 1.94 | 0.582 |
| 3-4                              | 0.87            | 0.43, 1.77  | 0.703 | 0.93              | 0.41, 2.10 | 0.862 | 0.89                   | 0.37, 2.13  | 0.795 | 0.95                   | 0.47, 1.91 | 0.883 |
| 4-5                              | 0.60            | 0.29, 1.25  | 0.175 | 0.42              | 0.19, 0.93 | 0.033 | 0.39                   | 0.17, 0.90  | 0.028 | 0.62                   | 0.30, 1.28 | 0.196 |
| 5-6                              | 0.64            | 0.22, 1.83  | 0.404 | 0.23              | 0.06, 0.88 | 0.032 | 0.16                   | 0.03, 0.81  | 0.026 | 0.66                   | 0.23, 1.87 | 0.432 |
| >6                               | 2.93            | 0.39, 22.09 | 0.296 | NE                | NE         | 0.952 | NE                     | NE          | 0.959 | 2.92                   | 0.39, 22.0 | 0.298 |
| <b>Detemir vs Human Insulin</b>  |                 |             |       |                   |            |       |                        |             |       |                        |            |       |
| 0-0.5                            | 0.92            | 0.59, 1.44  | 0.722 | 1.07              | 0.67, 1.71 | 0.767 | 1.08                   | 0.66, 1.76  | 0.761 | 0.92                   | 0.59, 1.45 | 0.733 |
| 0.5-1                            | 1.01            | 0.64, 1.59  | 0.963 | 0.98              | 0.60, 1.61 | 0.941 | 0.92                   | 0.54, 1.56  | 0.766 | 1.03                   | 0.66, 1.61 | 0.881 |
| 1-2                              | 1.21            | 0.84, 1.76  | 0.305 | 1.09              | 0.71, 1.67 | 0.683 | 1.09                   | 0.69, 1.71  | 0.721 | 1.23                   | 0.86, 1.77 | 0.260 |
| 2-3                              | 0.91            | 0.56, 1.50  | 0.722 | 0.88              | 0.51, 1.54 | 0.661 | 0.97                   | 0.53, 1.76  | 0.920 | 0.93                   | 0.57, 1.51 | 0.772 |
| 3-4                              | 0.96            | 0.51, 1.80  | 0.896 | 0.92              | 0.44, 1.91 | 0.814 | 0.91                   | 0.41, 1.99  | 0.807 | 0.90                   | 0.48, 1.70 | 0.752 |
| 4-5                              | 1.80            | 0.95, 3.40  | 0.072 | 2.37              | 1.21, 4.65 | 0.012 | 2.86                   | 1.40, 5.85  | 0.004 | 1.68                   | 0.89, 3.19 | 0.109 |
| 5-6                              | 1.53            | 0.61, 3.83  | 0.361 | 2.69              | 0.96, 7.53 | 0.059 | 3.19                   | 0.97, 10.41 | 0.055 | 1.46                   | 0.58, 3.65 | 0.416 |
| >6                               | 0.39            | 0.05, 2.77  | 0.344 | 0.00              | NE         | 0.953 | 0.00                   | NE          | 0.961 | 0.38                   | 0.05, 2.70 | 0.331 |
| <b>Endometrial cancer</b>        |                 |             |       |                   |            |       |                        |             |       |                        |            |       |
| <b>Glargine vs Human insulin</b> |                 |             |       |                   |            |       |                        |             |       |                        |            |       |
| 0-0.5                            | 1.74            | 1.05, 2.88  | 0.031 | 1.71              | 1.01, 2.92 | 0.047 | 1.60                   | 0.92, 2.78  | 0.096 | 1.78                   | 1.07, 2.94 | 0.026 |
| 0.5-1                            | 0.86            | 0.49, 1.50  | 0.589 | 0.86              | 0.48, 1.56 | 0.619 | 0.95                   | 0.52, 1.76  | 0.79  | 0.86                   | 0.49, 1.50 | 0.595 |
| 1-2                              | 0.61            | 0.35, 1.05  | 0.073 | 0.61              | 0.34, 1.08 | 0.089 | 0.52                   | 0.27, 0.98  | 0.044 | 0.61                   | 0.35, 1.04 | 0.072 |
| 2-3                              | 0.89            | 0.49, 1.61  | 0.702 | 0.69              | 0.36, 1.34 | 0.274 | 0.78                   | 0.39, 1.56  | 0.476 | 0.89                   | 0.49, 1.60 | 0.697 |
| 3-4                              | 1.63            | 0.90, 2.98  | 0.110 | 1.46              | 0.76, 2.78 | 0.257 | 1.75                   | 0.88, 3.50  | 0.112 | 1.62                   | 0.89, 2.96 | 0.113 |
| 4-5                              | 1.01            | 0.46, 2.22  | 0.986 | 0.87              | 0.36, 2.11 | 0.755 | 0.91                   | 0.34, 2.41  | 0.846 | 0.98                   | 0.44, 2.15 | 0.956 |
| 5-6                              | 0.71            | 0.25, 2.03  | 0.521 | 0.66              | 0.20, 2.21 | 0.505 | 0.27                   | 0.04, 1.98  | 0.196 | 0.70                   | 0.24, 2.01 | 0.506 |
| >6                               | 0.36            | 0.09, 1.47  | 0.154 | 0.27              | 0.04, 2.01 | 0.203 | 0.45                   | 0.06, 3.34  | 0.436 | 0.34                   | 0.08, 1.42 | 0.140 |
| <b>Glargine vs Detemir</b>       |                 |             |       |                   |            |       |                        |             |       |                        |            |       |
| 0-0.5                            | 1.70            | 0.76, 3.81  | 0.201 | 1.48              | 0.65, 3.38 | 0.347 | 1.52                   | 0.63, 3.65  | 0.348 | 1.51                   | 0.69, 3.27 | 0.300 |
| 0.5-1                            | 1.97            | 0.78, 4.99  | 0.153 | 1.79              | 0.69, 4.59 | 0.229 | 2.00                   | 0.72, 5.53  | 0.184 | 1.97                   | 0.78, 4.99 | 0.153 |

| Cumulative treatment time        | Type 2 diabetes |             |       | Nordic population |            |       | Entry from 2000 onward |            |       | Adjusted for menopause |             |       |
|----------------------------------|-----------------|-------------|-------|-------------------|------------|-------|------------------------|------------|-------|------------------------|-------------|-------|
|                                  | RR              | 95% CI      | P     | RR                | 95% CI     | P     | RR                     | 95% CI     | P     | RR                     | 95% CI      | P     |
| 1-2                              | 1.49            | 0.62, 3.60  | 0.372 | 1.34              | 0.55, 3.28 | 0.522 | 1.01                   | 0.39, 2.56 | 0.991 | 1.49                   | 0.62, 3.60  | 0.371 |
| 2-3                              | 0.79            | 0.35, 1.80  | 0.573 | 0.67              | 0.27, 1.66 | 0.387 | 0.68                   | 0.26, 1.78 | 0.438 | 0.79                   | 0.35, 1.80  | 0.575 |
| 3-4                              | 1.20            | 0.44, 3.27  | 0.726 | 1.19              | 0.39, 3.65 | 0.759 | 1.43                   | 0.41, 5.07 | 0.576 | 1.21                   | 0.44, 3.29  | 0.716 |
| 4-5                              | 1.10            | 0.23, 5.19  | 0.907 | 0.72              | 0.14, 3.59 | 0.690 | 0.59                   | 0.11, 3.04 | 0.524 | 1.11                   | 0.24, 5.27  | 0.891 |
| 5-6                              | NE              | NE          | 0.956 | NE                | NE         | 0.968 | NE                     | NE         | 0.974 | NE                     | NE          | 0.951 |
| >6                               | 0.13            | 0.02, 0.91  | 0.040 | NE                | NE         | 0.988 | NE                     | NE         | 0.990 | 0.13                   | 0.02, 0.91  | 0.040 |
| <b>Detemir vs Human Insulin</b>  |                 |             |       |                   |            |       |                        |            |       |                        |             |       |
| 0-0.5                            | 1.03            | 0.48, 2.22  | 0.945 | 1.16              | 0.53, 2.51 | 0.716 | 1.05                   | 0.46, 2.39 | 0.906 | 1.18                   | 0.57, 2.45  | 0.660 |
| 0.5-1                            | 0.44            | 0.18, 1.04  | 0.062 | 0.48              | 0.20, 1.17 | 0.105 | 0.48                   | 0.18, 1.25 | 0.131 | 0.44                   | 0.18, 1.04  | 0.063 |
| 1-2                              | 0.41            | 0.18, 0.92  | 0.030 | 0.45              | 0.20, 1.03 | 0.058 | 0.52                   | 0.23, 1.17 | 0.115 | 0.41                   | 0.18, 0.91  | 0.029 |
| 2-3                              | 1.13            | 0.54, 2.37  | 0.747 | 1.03              | 0.47, 2.26 | 0.941 | 1.13                   | 0.49, 2.62 | 0.767 | 1.13                   | 0.54, 2.36  | 0.753 |
| 3-4                              | 1.36            | 0.52, 3.56  | 0.526 | 1.22              | 0.42, 3.53 | 0.712 | 1.22                   | 0.36, 4.13 | 0.748 | 1.35                   | 0.52, 3.52  | 0.542 |
| 4-5                              | 0.92            | 0.22, 3.89  | 0.908 | 1.20              | 0.28, 5.12 | 0.802 | 1.55                   | 0.36, 6.69 | 0.558 | 0.88                   | 0.21, 3.72  | 0.860 |
| 5-6                              | 0.00            | NE          | 0.955 | 0.00              | NE         | 0.967 | 0.00                   | NE         | 0.970 | 0.00                   | NE          | 0.949 |
| >6                               | 2.79            | 0.66, 11.89 | 0.164 | 0.00              | NE         | 0.987 | 0.00                   | NE         | 0.989 | 2.71                   | 0.64, 11.53 | 0.177 |
| <b>Any cancer <sup>a</sup></b>   |                 |             |       |                   |            |       |                        |            |       |                        |             |       |
| <b>Glargine vs Human insulin</b> |                 |             |       |                   |            |       |                        |            |       |                        |             |       |
| 0-0.5                            | 1.15            | 1.01, 1.29  | 0.028 | 1.12              | 0.98, 1.28 | 0.084 | 1.10                   | 0.96, 1.26 | 0.185 |                        |             |       |
| 0.5-1                            | 1.11            | 0.95, 1.30  | 0.180 | 1.13              | 0.96, 1.34 | 0.150 | 1.20                   | 1.00, 1.43 | 0.045 |                        |             |       |
| 1-2                              | 0.91            | 0.79, 1.05  | 0.214 | 0.87              | 0.74, 1.01 | 0.073 | 0.87                   | 0.73, 1.03 | 0.106 |                        |             |       |
| 2-3                              | 1.03            | 0.88, 1.21  | 0.674 | 0.96              | 0.80, 1.15 | 0.675 | 0.93                   | 0.76, 1.12 | 0.434 |                        |             |       |
| 3-4                              | 0.86            | 0.70, 1.05  | 0.136 | 0.87              | 0.70, 1.09 | 0.226 | 0.91                   | 0.71, 1.15 | 0.413 |                        |             |       |
| 4-5                              | 1.10            | 0.88, 1.37  | 0.417 | 1.11              | 0.87, 1.43 | 0.403 | 1.18                   | 0.90, 1.56 | 0.229 |                        |             |       |
| 5-6                              | 0.96            | 0.71, 1.29  | 0.777 | 0.71              | 0.47, 1.06 | 0.092 | 0.60                   | 0.36, 0.98 | 0.042 |                        |             |       |
| >6                               | 0.76            | 0.57, 1.01  | 0.058 | 0.96              | 0.68, 1.36 | 0.810 | 1.06                   | 0.71, 1.57 | 0.787 |                        |             |       |
| <b>Glargine vs Detemir</b>       |                 |             |       |                   |            |       |                        |            |       |                        |             |       |
| 0-0.5                            | 1.11            | 0.92, 1.33  | 0.273 | 1.07              | 0.88, 1.31 | 0.490 | 1.05                   | 0.86, 1.29 | 0.614 |                        |             |       |

| Cumulative treatment time       | Type 2 diabetes |            |       | Nordic population |            |       | Entry from 2000 onward |            |       | Adjusted for menopause |        |   |
|---------------------------------|-----------------|------------|-------|-------------------|------------|-------|------------------------|------------|-------|------------------------|--------|---|
|                                 | RR              | 95% CI     | P     | RR                | 95% CI     | P     | RR                     | 95% CI     | P     | RR                     | 95% CI | P |
| 0.5-1                           | 1.16            | 0.93, 1.44 | 0.196 | 1.17              | 0.92, 1.48 | 0.209 | 1.19                   | 0.92, 1.53 | 0.187 |                        |        |   |
| 1-2                             | 0.96            | 0.79, 1.17 | 0.670 | 0.96              | 0.77, 1.20 | 0.696 | 0.92                   | 0.73, 1.17 | 0.515 |                        |        |   |
| 2-3                             | 1.12            | 0.86, 1.44 | 0.398 | 1.10              | 0.83, 1.47 | 0.514 | 1.06                   | 0.78, 1.46 | 0.697 |                        |        |   |
| 3-4                             | 0.78            | 0.57, 1.07 | 0.128 | 0.96              | 0.65, 1.42 | 0.845 | 0.97                   | 0.64, 1.48 | 0.903 |                        |        |   |
| 4-5                             | 1.10            | 0.71, 1.71 | 0.661 | 0.91              | 0.55, 1.49 | 0.702 | 0.82                   | 0.49, 1.39 | 0.467 |                        |        |   |
| 5-6                             | 0.77            | 0.44, 1.33 | 0.343 | 0.54              | 0.24, 1.19 | 0.124 | 0.35                   | 0.14, 0.84 | 0.019 |                        |        |   |
| >6                              | 0.84            | 0.43, 1.66 | 0.617 | NE                | NE         | 0.923 | NE                     | NE         | 0.935 |                        |        |   |
| <b>Detemir vs Human Insulin</b> |                 |            |       |                   |            |       |                        |            |       |                        |        |   |
| 0-0.5                           | 1.03            | 0.88, 1.22 | 0.686 | 1.05              | 0.88, 1.26 | 0.605 | 1.04                   | 0.86, 1.25 | 0.670 |                        |        |   |
| 0.5-1                           | 0.96            | 0.78, 1.18 | 0.701 | 0.97              | 0.78, 1.21 | 0.791 | 1.01                   | 0.80, 1.28 | 0.921 |                        |        |   |
| 1-2                             | 0.95            | 0.80, 1.14 | 0.617 | 0.90              | 0.74, 1.11 | 0.332 | 0.94                   | 0.76, 1.17 | 0.583 |                        |        |   |
| 2-3                             | 0.93            | 0.73, 1.18 | 0.531 | 0.87              | 0.67, 1.14 | 0.321 | 0.87                   | 0.65, 1.16 | 0.341 |                        |        |   |
| 3-4                             | 1.10            | 0.83, 1.46 | 0.515 | 0.91              | 0.64, 1.29 | 0.588 | 0.93                   | 0.63, 1.37 | 0.711 |                        |        |   |
| 4-5                             | 0.99            | 0.66, 1.50 | 0.980 | 1.23              | 0.78, 1.94 | 0.381 | 1.44                   | 0.89, 2.33 | 0.141 |                        |        |   |
| 5-6                             | 1.25            | 0.76, 2.04 | 0.375 | 1.32              | 0.65, 2.67 | 0.446 | 1.72                   | 0.80, 3.67 | 0.162 |                        |        |   |
| >6                              | 0.9             | 0.48, 1.69 | 0.748 | 0.00              | NE         | 0.923 | 0.00                   | NE         | 0.936 |                        |        |   |

<sup>a</sup> Any cancer except non-melanoma skin cancer

Abbreviations: RR – rate ratio, CI – confidence interval, NE – not estimable.

## ESM Figures

### Cumulative time

- × ≤ 0.5
- 0.5–1
- ◆ 1–2
- 2–3
- 3–4
- ◇ 4–5
- 5–6
- 6–7
- ◇ 7–8
- 8–9
- △ 9–10

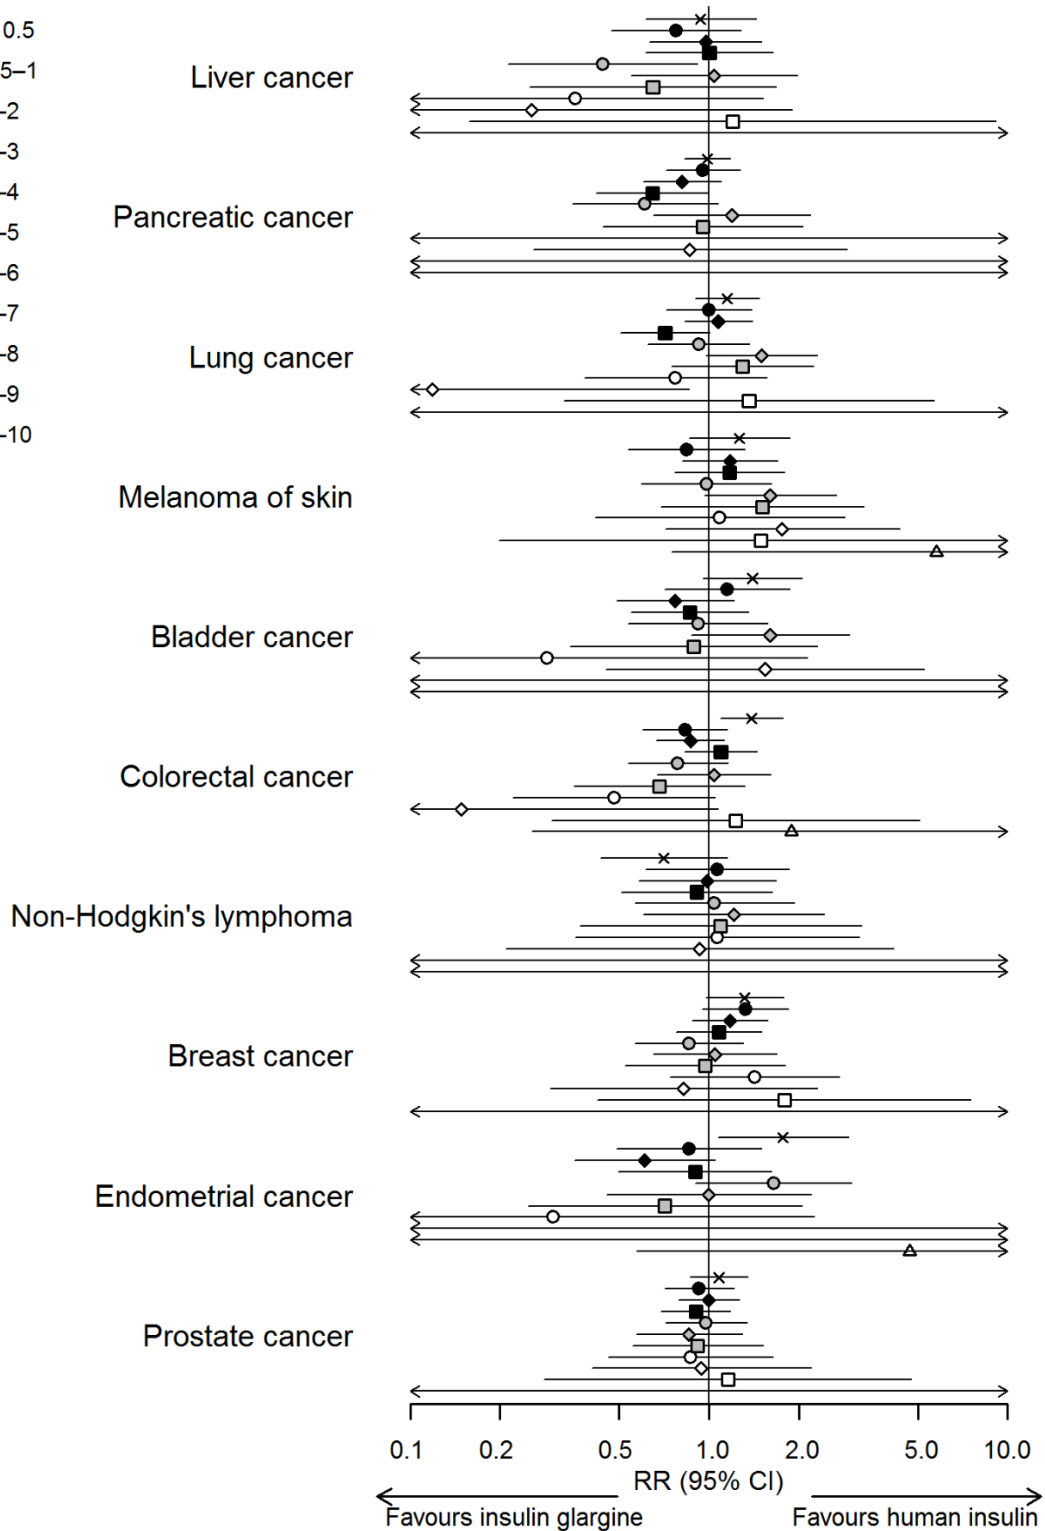

**ESM Figure 1.** Adjusted (all sites and any cancer: age, calendar time, sex, NIADs, duration of insulin-treated diabetes, country; liver, colorectal, breast, and endometrial cancer: additional adjustment for relevant co-medications) rate ratio (RR) with 95% confidence interval (CI) for site-specific cancers by the cumulative treatment time (years) on glargine versus human insulin.

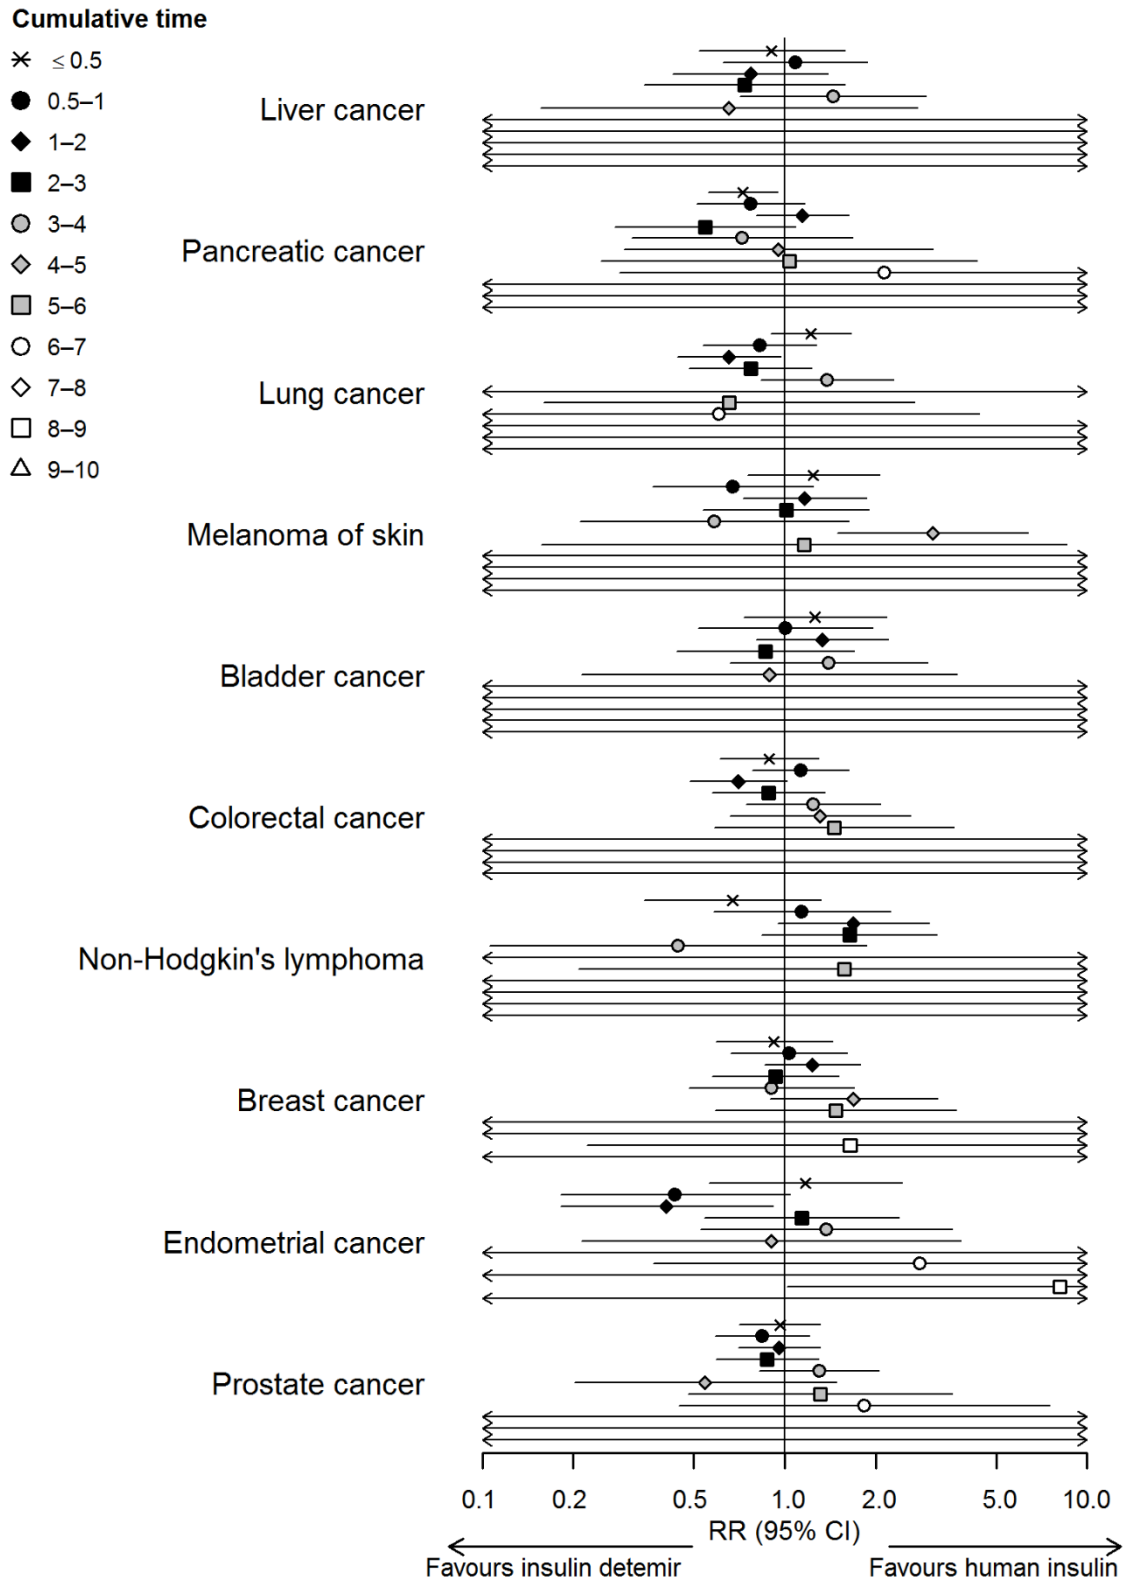

**ESM Figure 2.** Adjusted (all sites and any cancer: age, calendar time, sex, NIADs, duration of insulin-treated diabetes, country; liver, colorectal, breast, and endometrial cancer: additional adjustment for relevant co-medications) rate ratio (RR) with 95% confidence interval (CI) for site-specific cancers by the cumulative treatment time (years) on detemir versus human insulin.

**Cumulative time**

- × ≤ 0.5
- 0.5–1
- ◆ 1–2
- 2–3
- 3–4
- ◇ 4–5
- ◻ 5–6
- 6–7
- ◇ 7–8
- ◻ 8–9
- △ 9–10

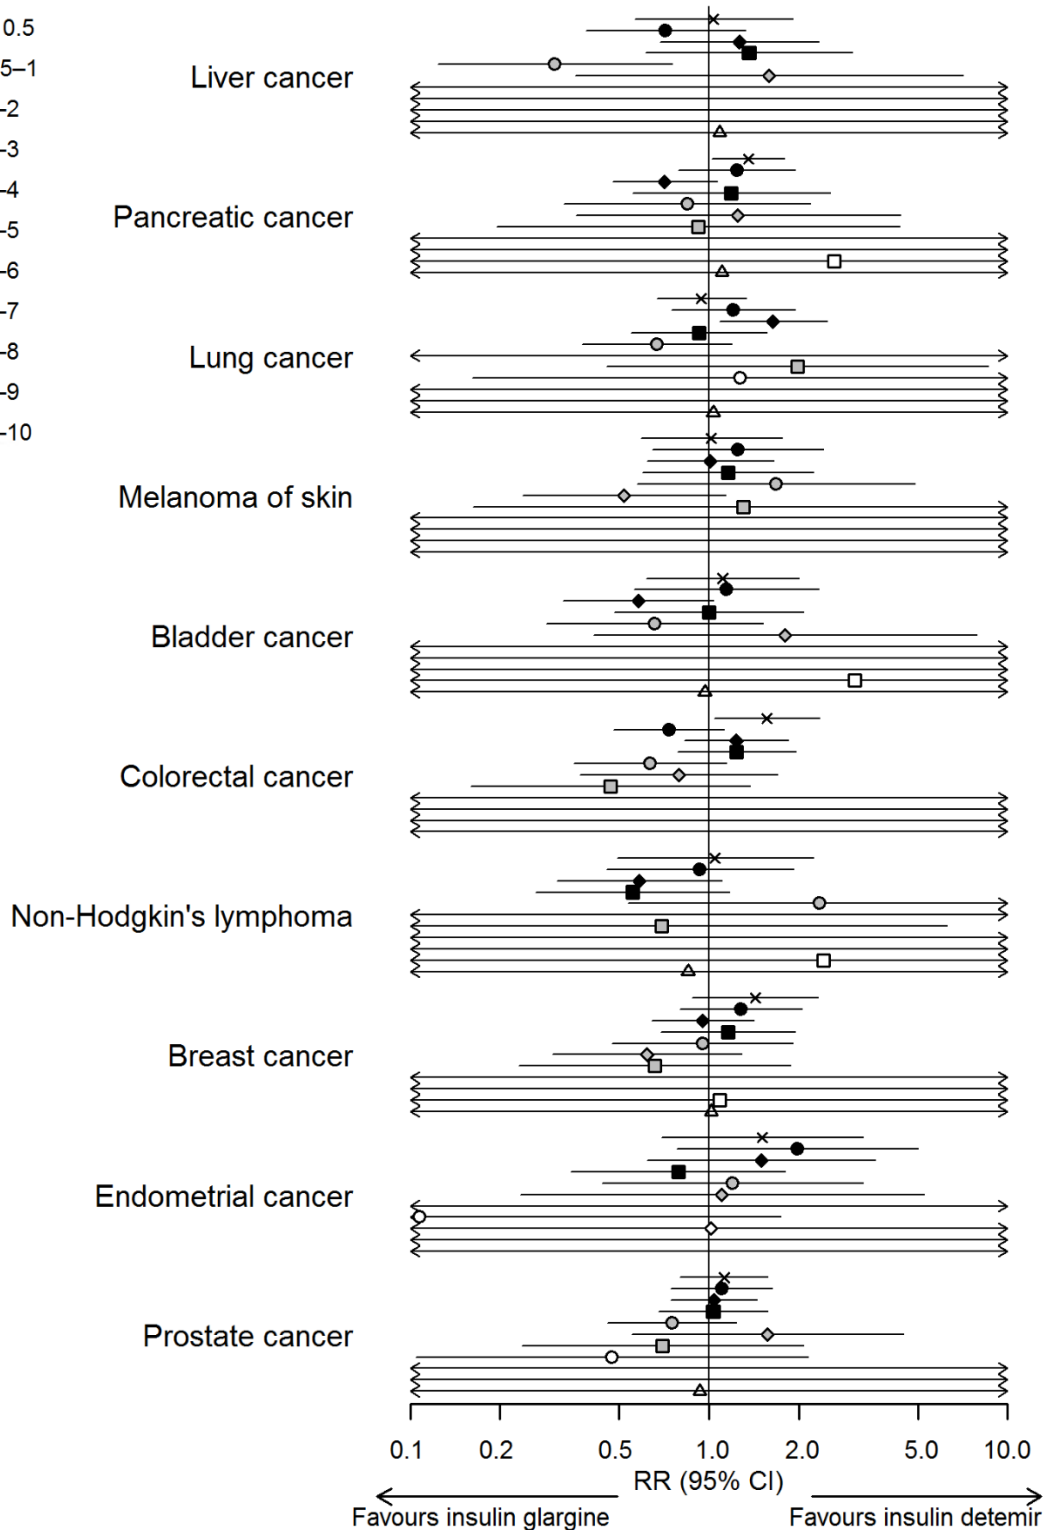

**ESM Figure 3.** Adjusted (all sites and any cancer: age, calendar time, sex, NIADs, duration of insulin-treated diabetes, country; liver, colorectal, breast, and endometrial cancer: additional adjustment for relevant co-medications) rate ratio (RR) with 95% confidence interval (CI) for site-specific cancers by the cumulative treatment time (years) on glargine versus detemir.
